# Supplementary material for: PPI-Affinity: A Web Tool for the Prediction and Optimization of Protein–Peptide and Protein–Protein Binding Affinity
Source: PubMed Central journal article supplement — J Proteome Res. 2022 Jun 2;21(8):1829–41. doi: 10.1021/acs.jproteome.2c00020 (PMC9361347; doi:10.1021/acs.jproteome.2c00020), 2022-06-02
Supplement: pr2c00020_si_001.pdf [file pr2c00020_si_001.pdf]

# Supporting Information

## PPI-Affinity: A web tool for the prediction and optimization of protein – peptide and protein – protein binding affinity

*Sandra Romero-Molina<sup>1</sup>, Yasser B. Ruiz-Blanco<sup>1</sup>, Joel Mieres-Perez<sup>1</sup>, Mirja Harms<sup>2</sup>, Jan Münch<sup>2,3</sup>, Michael Ehrmann<sup>4</sup> and Elsa Sanchez-Garcia<sup>1\*</sup>*

<sup>1</sup>Computational Biochemistry, Center of Medical Biotechnology, University of Duisburg-Essen, Essen, Germany

<sup>2</sup>Institute of Molecular Virology, Ulm University Medical Center, Ulm, Germany

<sup>3</sup>Core Facility Functional Peptidomics, Ulm University Medical Center, Ulm, Germany

<sup>4</sup>Faculty of Biology, Center of Medical Biotechnology, University of Duisburg-Essen, Essen, Germany

\*Email: [elsa.sanchez-garcia@uni-due.de](mailto:elsa.sanchez-garcia@uni-due.de)

## Table of Contents

|                                                                                                                                                                    |     |
|--------------------------------------------------------------------------------------------------------------------------------------------------------------------|-----|
| <b>Table SI-1.</b> Description of PPI-Affinity and state-of-the-art PPI prediction tools. ....                                                                     | S4  |
| <b>Table SI-2.</b> Correlation coefficient (R) of protein-protein and protein-ligand BA predictors on the test set of 100 protein-peptide complexes. ....          | S10 |
| <b>Figure SI-1.</b> Distribution of $\Delta G_{bind}$ values in the dataset of 833 protein-protein complexes. ....                                                 | S11 |
| <b>Section SI-1.</b> Parameter setup for the calculation of the structural descriptors in ProtDCal. <sup>7,8</sup> .....                                           | S12 |
| <b>Section SI-2</b> Preliminary study conducted to identify the Machine Learning (ML) technique to use in the development of the models. ....                      | S13 |
| <b>Section SI-3.</b> Description of the feature selection process for the protein-protein BA modeling. ....                                                        | S15 |
| <b>Table SI-3.1.</b> Descriptors of the protein-protein model. ....                                                                                                | S15 |
| <b>File SI-1 (separated).</b> Configuration file for ProtDCal to compute the 26 structural descriptors. ....                                                       | S17 |
| <b>Figure SI-2.</b> Distribution of $\Delta G_{bind}$ values in the four subsets of the training data for the protein-protein ensemble learning protocol. ....     | S18 |
| <b>Table SI-3.</b> Summary of the intermediate models and performance measures for the protein-protein BA modeling during the hyperparameters tuning process. .... | S19 |
| <b>Table SI-4.</b> Summary of the performance of the individual and the ensemble models for protein-protein models. ....                                           | S21 |
| <b>Figure SI-3.</b> Characterization of the dataset of protein-peptide complexes used in this work. ....                                                           | S22 |
| <b>Section SI-4.</b> Description of the process of feature selection for creating the protein-peptide model. ....                                                  | S23 |
| <b>Table SI-4.1.</b> Descriptors of the protein-peptide model. ....                                                                                                | S23 |
| <b>File SI-2 (separated).</b> Configuration file for ProtDCal to compute the 37 structural descriptors. ....                                                       | S25 |
| <b>Figure SI-4.</b> Distribution of $\Delta G_{bind}$ values in the four subsets of the training data for the protein-peptide ensemble learning protocol. ....     | S26 |
| <b>Table SI-5.</b> Summary of the intermediate models and performance measures for the protein-peptide modeling during the hyperparameters tuning process. ....    | S27 |
| <b>Table SI-6.</b> Summary of the performance of the individual and the ensemble models for protein-peptide models. ....                                           | S30 |
| <b>Figure SI-5.</b> Plots of experimental vs. predicted BA values of PPI-Affinity on the test sets of protein – protein affinity data. ....                        | S31 |
| <b>Section SI-5.</b> Performance of PPI-Affinity vs. a state-of-the-art binding affinity classifier. ....                                                          | S32 |
| <b>Table SI-5.1.</b> Summary of the evaluation of PPI-Affinity and the LUPIA <sup>2</sup> classifier on two sets of protein – protein affinity data. ....          | S33 |
| <b>Figure SI-6.</b> Plot of experimental vs. predicted by PPI-Affinity BA values on the test set of protein – peptide affinity data. ....                          | S34 |

|                                                                                                                                                                         |     |
|-------------------------------------------------------------------------------------------------------------------------------------------------------------------------|-----|
| <b>Section SI-6.</b> Description of the assays used to determine the binding affinities of EPI-X4 derivatives against the CRCX4 receptor.....                           | S35 |
| <b>Table SI-6.1</b> Summary of the binding affinities of EPI-X4 derivatives against CRCX4.                                                                              | S35 |
| <b>Section SI-7.</b> Description of the models used for the generation of the data related to peptide binders to the PDZ domain of HTRA1 or HTRA3 (Tables 3 and 4)..... | S37 |
| <b>Table SI-7.1.</b> Ranking of BA of HTRA1-peptide complexes as predicted by state-of-the-art models.....                                                              | S38 |
| <b>Table SI-7.2.</b> Ranking of BA of HTRA3-peptide complexes as predicted by state-of-the-art models.....                                                              | S38 |
| <b>Table SI-7.</b> Summary of values that define the applicability domain of the protein-protein model.....                                                             | S40 |
| <b>Table SI-8.</b> Summary of values that define the applicability domain of the protein-peptide model.....                                                             | S42 |
| <b>Table SI-9.</b> Summary of the minimum and maximum values of the sequences' length of the peptides and proteins in each dataset. ....                                | S44 |
| <b>Table SI-10.</b> Descriptive statistics of the different data sets used in the modeling and test of the protein-protein BA predictor.....                            | S45 |
| <b>Table SI-11.</b> Descriptive statistics of the training, development and test sets used in the modeling of the protein-peptide BA predictor.....                     | S46 |

**Table SI-1.** Description of PPI-Affinity and state-of-the-art PPI prediction tools.

| <i>Method</i>               | <i>Training size</i> | <i>Database</i>                                         | <i>Type of problem</i> | <i>Validation technique</i>                 | <i>Domain of application</i> | <i>Input information</i> | <i>Type of molecular descriptors</i>                                                                   | <i>ML algorithms</i>           | <i>Availability</i>            |
|-----------------------------|----------------------|---------------------------------------------------------|------------------------|---------------------------------------------|------------------------------|--------------------------|--------------------------------------------------------------------------------------------------------|--------------------------------|--------------------------------|
| <i>Prodigy</i> <sup>1</sup> | 81                   | Benchmark dataset (Kastritis et al., 2011) <sup>2</sup> | Regression             | 4-fold cross validation (repeated 10 times) | Protein-Protein              | 3D                       | Descriptors based in the network of inter-residue contacts (ICs) and the non-interacting surface (NIS) | Linear Regression              | Webserver                      |
| <i>DFIRE</i> <sup>3</sup>   | -                    | -                                                       | -                      | Test set                                    | Protein-Protein/Peptide      | 3D                       | -                                                                                                      | -                              | Webserver / Standalone program |
| <i>CP_PIE</i> <sup>4</sup>  | 540                  | PDB <sup>5, 6</sup>                                     | Regression             | Test set                                    | Protein-Protein              | 3D                       | Descriptors based on residue contacts and the overlapping area                                         | Linear programming formulation | Standalone program             |
| <i>Kdeep</i> <sup>7</sup>   | 3767                 | PDBbind (v.2016) <sup>8</sup>                           | Regression             | Test set                                    | Protein-Ligand               | 3D                       | Pharmacophoric-like properties in the                                                                  | Convolutional Neural Networks  | Webserver                      |

|                                         |      |                                                                        |                |                                       |                                             |    | binding site                                                                                                |                                                                                  |                    |
|-----------------------------------------|------|------------------------------------------------------------------------|----------------|---------------------------------------|---------------------------------------------|----|-------------------------------------------------------------------------------------------------------------|----------------------------------------------------------------------------------|--------------------|
| <b><i>RF-Score</i></b> <sup>9</sup>     | 1105 | PDBbind (v.2007) <sup>8</sup>                                          | Regression     | Out-Of-Bag data/Test set/y-scrambling | Protein-Ligand                              | 3D | Occurrence counts of atom type pairs within a distance range                                                | Random Forest                                                                    | Standalone program |
| <b><i>Trypano-PPI</i></b> <sup>10</sup> | 5872 | PDB <sup>5,6</sup> / dataset reported by Dobson and Doig <sup>11</sup> | Classification | Validation set                        | Protein-Protein interactions in Trypanosome | 3D | Markov Chain numerical descriptors based on average electrostatic potentials (MARCH-INSIDE 2.0 package)     | Linear Neural Network                                                            | Webserver          |
| <b><i>Plasmod-PPI</i></b> <sup>12</sup> | 5257 | PDB <sup>5,6</sup> / dataset reported by Dobson and Doig <sup>11</sup> | Classification | Validation set                        | Protein-Protein interactions in Plasmodium  | 3D | Markov Chain numerical descriptors based on electrostatic entropies calculations (MARCH-INSIDE 2.0 package) | Classifier Trees (CT) / Linear discriminant analysis (LDA) for feature selection | Webserver          |

|                                       |                                    |                                                         |                |                                                             |                                                                                  |    |                                                                                                                                                                                               |                                                              |                    |
|---------------------------------------|------------------------------------|---------------------------------------------------------|----------------|-------------------------------------------------------------|----------------------------------------------------------------------------------|----|-----------------------------------------------------------------------------------------------------------------------------------------------------------------------------------------------|--------------------------------------------------------------|--------------------|
| <b><i>GO-PseAA</i></b> <sup>13</sup>  | 6323                               | STRING <sup>14</sup>                                    | Classification | Jack-knife test (LOOCV)                                     | Protein-Protein                                                                  | 1D | Pseudo-amino acid composition (PseAA)/ Gene Ontology Consortium (GO)                                                                                                                          | Intimate Sorting (ISort) Classifier                          | -                  |
| <b><i>ALT-IN</i></b> <sup>15</sup>    | Dataset 1: 1831<br>Dataset 2: 5460 | Dataset 1: <sup>16</sup><br>Dataset 2: <sup>16-20</sup> | Classification | Nested leave-group-out cross validation (CV) /Case of study | Protein-Protein (predicting disruptions in PPIs induced by alternative splicing) | 1D | Biochemical features of the reference isoform and its interaction partner/ Domain interaction knowledge-based statistical potentials/ Selected characteristics of alternative splicing events | Random Forest-driven supervised and semi-supervised learning | Standalone program |
| <b><i>iPPBS-Opt</i></b> <sup>21</sup> | 13771 surface-residue / 27442      | Dataset of 99 proteins <sup>22</sup>                    | Classification | 10-fold CV                                                  | Protein-Protein/Peptide binding sites                                            | 1D | Pseudo Amino Acid Composition (PseAAC )                                                                                                                                                       | Random Forest                                                | Webserver          |

|                              |                                                     |                                                                                                       |            |                       |                 |    |                                                                                                                                           |                                             |                          |
|------------------------------|-----------------------------------------------------|-------------------------------------------------------------------------------------------------------|------------|-----------------------|-----------------|----|-------------------------------------------------------------------------------------------------------------------------------------------|---------------------------------------------|--------------------------|
|                              | all-residue                                         |                                                                                                       |            |                       |                 |    |                                                                                                                                           |                                             |                          |
| <b>PPA-Pred<sup>23</sup></b> | 135                                                 | Benchmark dataset (Kastritis <i>et al.</i> , 2011) <sup>2</sup>                                       | Regression | LOOCV                 | Protein-Protein | 1D | Descriptors based in sequence and structure properties                                                                                    | Multiple regression technique               | Webserver                |
| <b>ISLAND<sup>24</sup></b>   | 135/39 test                                         | Benchmark dataset (Kastritis <i>et al.</i> , 2011) <sup>2</sup>                                       | Regression | LOOCV                 | Protein-Protein | 1D | Descriptors based on biophysical amino acids properties and structural properties derived from the sequence (Propy package) <sup>25</sup> | Support Vector Machine (SVM) for regression | Webserver                |
| <b>SSIPe<sup>26</sup></b>    | 1470 training/<br>734 test/<br>888 test/<br>190/152 | NIL <sup>27</sup> /<br>STRING <sup>14</sup> /<br>SKEMPI<br>2.0 <sup>28</sup> /CAPR<br>I <sup>29</sup> | Regression | 5-fold<br>CV/Test set | Protein-Protein | 3D | Descriptors based in sequence and structure                                                                                               | Monte Carlo procedure/<br>Linear regression | Webserver/<br>Standalone |

|                                 |                                                   |                                                                                     |                |                        |                 |    |                                                                                                                                   |                                                                              |                                |
|---------------------------------|---------------------------------------------------|-------------------------------------------------------------------------------------|----------------|------------------------|-----------------|----|-----------------------------------------------------------------------------------------------------------------------------------|------------------------------------------------------------------------------|--------------------------------|
|                                 |                                                   |                                                                                     |                |                        |                 |    | interface<br>evolutionary<br>profiles                                                                                             |                                                                              |                                |
| <b>Wang et al.<sup>30</sup></b> | 158 wild-type protein complexes and 3205 mutants  | SKEMPI 1.0 <sup>31</sup>                                                            | Regression     | LOOCV                  | Protein-Protein | 3D | Numerical descriptors based on energetic contributions and calculated with the Monte-Carlo algorithm                              | Knowledge-based potential (Monte-Carlo simulations for weights optimization) | -                              |
| <b>LUPIA<sup>32</sup></b>       | 128 (training set) / 39 protein- (validation set) | Benchmark dataset (Kastritis et al., 2011) <sup>2</sup> / Chen et al. <sup>33</sup> | Classification | LOOCV / validation set | Protein-Protein | 1D | k-mer composition, BLOSUM-62 features, <sup>3</sup> <sup>4</sup> number of interacting residue pairs, Moal <sup>35</sup> and Dias | Learning Using Privileged Information (LUPI) / SVM                           | Webserver / Standalone program |



|                            |                                                     |                                                 |            |                                   |                     |    |                                                                                                                        |                             |           |
|----------------------------|-----------------------------------------------------|-------------------------------------------------|------------|-----------------------------------|---------------------|----|------------------------------------------------------------------------------------------------------------------------|-----------------------------|-----------|
| <b><i>PPI-Affinity</i></b> | 648                                                 | PDBbind                                         | Regression | 10-fold                           | Protein-            | 3D | descripto                                                                                                              |                             |           |
|                            | protein-<br>protein /<br>922<br>protein-<br>peptide | (v.2020) <sup>8</sup> /<br>Biolip <sup>37</sup> |            | CV/Validati<br>on set/Test<br>set | Protein/Pept<br>ide |    | rs <sup>36</sup><br>Structura<br>l<br>numera<br>l<br>descripto<br>rs<br>calcu<br>lated<br>with<br>ProtDCal<br>software | Ensemble<br>method /<br>SVM | Webserver |

**Table SI-2.** Correlation coefficient ( $R$ ) of protein-protein and protein-ligand BA predictors on the test set of 100 protein-peptide complexes.

| Method                   | $R$   | MAE (kcal/mol) |
|--------------------------|-------|----------------|
| Prodigy <sup>1, 38</sup> | 0.13  | 1.9            |
| DFIRE <sup>3</sup>       | 0.29  | 8.7            |
| PIE <sup>4</sup>         | -0.28 | 9.0            |
| Kdeep <sup>*7</sup>      | 0.32  | 10.7           |
| RF-Score <sup>*39</sup>  | 0.23  | 1.8            |

Protein-ligand methods are marked with \*

**Figure SI-1.** Distribution of  $\Delta G_{bind}$  values in the dataset of 833 protein-protein complexes.

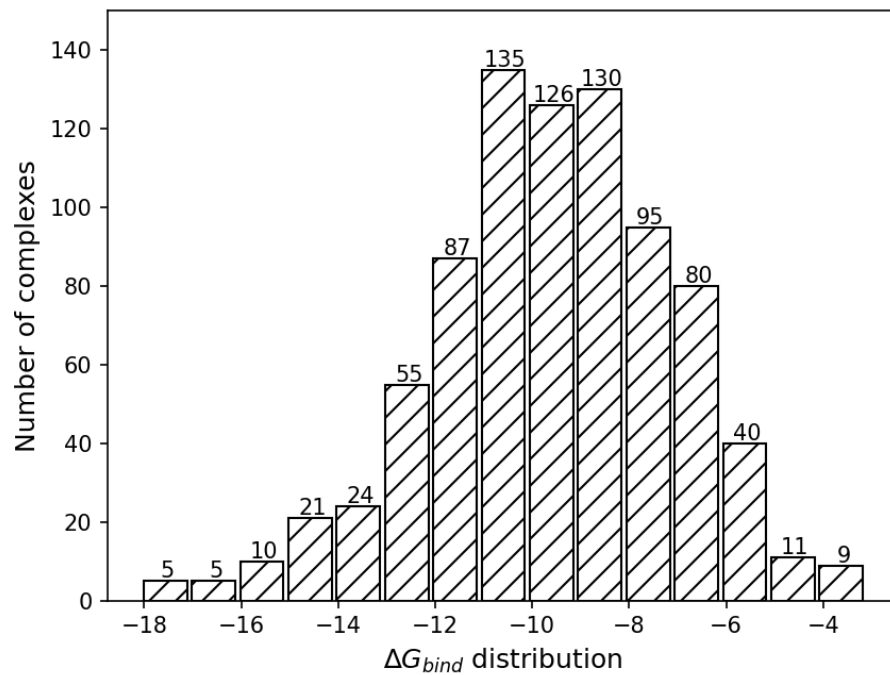

**Section SI-1.** Parameter setup for the calculation of the structural descriptors in ProtDCal.<sup>40, 41</sup>

| <b>Sections</b>                                                                                                                                                | <b>Description</b>                                                                        |
|----------------------------------------------------------------------------------------------------------------------------------------------------------------|-------------------------------------------------------------------------------------------|
| directory:                                                                                                                                                     |                                                                                           |
| Datasets/PDB_Protein_Format                                                                                                                                    | Path to directory with the input PDB files                                                |
| indices:                                                                                                                                                       |                                                                                           |
| wNc, wFLC, wNLC, wCO, wLCO, wRWCO, wCTP, wCLQ                                                                                                                  | List of used Topographic Indices of Folded Protein States                                 |
| wCO:                                                                                                                                                           |                                                                                           |
| ECI, IP, ISA, Z1, Z2, Z3                                                                                                                                       | List of used weighting coefficients for each Topographic Indices of Folded Protein States |
| wRWCO:                                                                                                                                                         |                                                                                           |
| ECI, IP, ISA, Z1, Z2, Z3                                                                                                                                       |                                                                                           |
| wNc:                                                                                                                                                           |                                                                                           |
| ECI, IP, ISA, Z1, Z2, Z3                                                                                                                                       |                                                                                           |
| wCLQ:                                                                                                                                                          |                                                                                           |
| ECI, IP, ISA, Z1, Z2, Z3                                                                                                                                       |                                                                                           |
| wNLC:                                                                                                                                                          |                                                                                           |
| ECI, IP, ISA, Z1, Z2, Z3                                                                                                                                       |                                                                                           |
| wLCO:                                                                                                                                                          |                                                                                           |
| ECI, IP, ISA, Z1, Z2, Z3                                                                                                                                       |                                                                                           |
| wCTP:                                                                                                                                                          |                                                                                           |
| ECI, IP, ISA, Z1, Z2, Z3                                                                                                                                       |                                                                                           |
| wFLC:                                                                                                                                                          |                                                                                           |
| ECI, IP, ISA, Z1, Z2, Z3                                                                                                                                       |                                                                                           |
| groups:                                                                                                                                                        |                                                                                           |
| ALA, ARG, ASN, ASP, CYS, GLU, GLN, GLY, HIS, ILE, LEU, LYS, MET, PHE, PRO, SER, THR, TRP, TYR, VAL, RTR, BSR, AHR, ALR, NPR, ARM, PLR, PCR, NCR, UCR, UFR, PRT | List of grouping operators                                                                |
| invariants:                                                                                                                                                    |                                                                                           |
| N1, N2, Ar, P2, G, V, CV, S, RA, K, DE, I50, SI, MI, TI                                                                                                        | List of vicinity operators                                                                |
| parameters(t_cont,s_cont,A%,HydGroup,n,bi ns,K,SubG):                                                                                                          |                                                                                           |
| 4000.0, 10.0, 5.0, 9.4, 3.0, 30, 5, 3                                                                                                                          | Parameters values for internal options of the program                                     |
| options(decimals,harmonicMeanType,geometricMeanType,windexID,datasetType,outputOrder):                                                                         |                                                                                           |
| 3, 0, 0, -1, pdb, true                                                                                                                                         | Parameters values for internal options of the program                                     |

**Section SI-2** Preliminary study conducted to identify the Machine Learning (ML) technique to use in the development of the models.

First, we randomly divided the 833 protein-protein complexes into datasets of 743 and 90 structures to train and test the models respectively. Initially, ProtDCal generated 23 040 molecular descriptors for each protein-protein complex. We reduced this high number of dimensions through an attribute selection process. First, we applied a filter to remove descriptors with non or little variation in the training set (*RemoveUseless* filter of Weka). A descriptor that cannot be calculated for an instance represents a missing value in the final vector. For a regression problem, this means that missing values need to be replaced by a number (mean, median, ...). Since this could add more noise to the dataset, we handled this issue by deleting all the attributes that contained at least one instance with a missing value. These steps reduced the dataset to 1 477 attributes. Next, we ordered the attributes by their Pearson's correlation coefficient with the class (*CorrelationAttributeEval* implementation of Weka). The highest correlation of an attribute with the class was 0.24, while the minimum was -0.32. We selected those with correlation values between  $0.1 \leq R \leq -0.1$ , reducing the data to 476 descriptors.

Next, we applied the *WrapperSubsetEval* technique implemented in Weka for obtaining the best subset of attributes to predict the class value. This is a supervised technique that evaluates subsets of features by training and evaluating, directly employing the classifier. The selection of the subsets is held by a search method. Here, we employed a genetic algorithm with a population of 20 individuals, crossover and mutation probabilities of 0.6 and 0.033 respectively and 20 generations maximum. Each subset was evaluated in 5-fold cross-validation, and the selection of the best subset was carried out attending to the correlation coefficient achieved by the classifier. This process was performed by each method individually (Table SI-2.1). We employed the Weka implementations of Linear Regression, Multilayer Perceptron: with zero (Linear Neural Network, LNN), one (ANN-1H) and two (ANN-2H) hidden layers, Random Forest, SVM for regression with the polynomial of degree one (SVM-PK-D1), degree two (SVM-PK-D2), and radial basis function (SVM-RBF) kernels. All the classifiers were executed with the default parameters values provided by Weka. In the case of Neural Networks, the amount of nodes ( $a$ ) per hidden layer is defined by default in Weka as:  $a = (d + c) / 2$ , where  $d$  is the number of descriptors and  $c$  is the number of classes ( $c=1$  for regression). For SVM-PK-D2, the Wrapper method was not applied, and the evaluation was performed on the attributes selected by SVM-PK-D1.

**Table SI-2.1.** Summary of the performance of different classifiers after the application of feature selection steps on the protein-protein BA data. The column "Descriptors" contains the number of attributes selected by each method with the Wrapper technique. The performance is expressed as the Pearson's Correlation coefficient ( $R$ ) between experimental and predicted BA. Each model was evaluated on the training set, in 10-fold cross-validation (10-fold CV), and on the test set of 90 data points taken from PDBbind (v.2020).<sup>8</sup> The methods tested were Linear Regression, Multilayer Perceptron with zero (Linear Neural Network, LNN), one (ANN-1H) and two (ANN-2H) hidden layers, Random Forest, Support Vector Machine for regression with the polynomial (SVM-PK-D1, SVM-PK-D2) and the Radial Basis Function (SVM-RBF) kernels.

|                   | Descriptors | Training set |     | 10-fold CV |     | Test set |     |
|-------------------|-------------|--------------|-----|------------|-----|----------|-----|
|                   |             | R            | MAE | R          | MAE | R        | MAE |
| Linear Regression | 74          | 0.68         | 1.4 | 0.60       | 1.6 | 0.39     | 2.0 |
| LNN               | 12          | -0.05        | 3.4 | 0.20       | 2.3 | -0.01    | 3.1 |
| ANN-1H            | 11          | 0.58         | 1.6 | 0.40       | 1.9 | 0.41     | 1.8 |
| ANN-2H            | 10          | 0.55         | 1.7 | 0.39       | 1.9 | 0.40     | 1.9 |
| Random Forest     | 27          | 0.98         | 0.6 | 0.67       | 1.5 | 0.61     | 1.6 |
| SVM-PK-D1         | 36          | 0.57         | 1.5 | 0.54       | 1.6 | 0.40     | 1.9 |
| SVM-PK-D2         | 36          | 0.77         | 1.0 | 0.42       | 2.0 | 0.38     | 2.0 |
| SVM-RBF           | 171         | 0.63         | 1.4 | 0.58       | 1.6 | 0.45     | 1.8 |

The smallest subset of descriptors was obtained by the Neural Networks methods. However, under these architectures the models suffered from both: under-fitting in the case of LNN, with non or small correlation values among the model evaluations, as well as over-fitting in the case of ANN-1H and ANN-2H, with a difference greater than the 20% between the correlation on the training set, and 10-fold CV, and test set. In the case of Random Forest, the results on the training set (R = 0.98, MAE = 0.6), along with the performance in CV (R = 0.67, MAE = 1.5) and on the test set (R = 0.61, MAE = 1.6) clearly denoted high over-fitting.

Linear Regression showed close performance on the training set (R = 0.68, MAE = 1.4) and in 10-fold CV (R = 0.6, MAE = 1.6). However, the number of descriptors equal to 74 could harm the generalization power of the model, which may explain the fall in performance on the test set.

SVM exhibited slightly better results with the RBF kernel than with the polynomial kernel of degree one (SVM-PK-D1). However, this performance was achieved with almost five times more descriptors. In addition, we must consider that the polynomial kernel of first order is a linear equation. Thus, we can conclude that SVM with the polynomial kernel of first order provides the simplest and best-performing solutions. Therefore, we selected this framework to develop our models.

### Section SI-3. Description of the feature selection process for the protein-protein BA modeling.

Initially, each instance in the dataset was represented as a vector of 23 040 molecular descriptors generated with ProtDCal, creating an initial matrix of 653 instances x 23.040 descriptors. For identifying the subset of attributes that best approximates the binding free energy value, we applied unsupervised and supervised features selection techniques.

First, we reduced the matrix dimensionality to 9 004 descriptors by applying the *RemoveUseless* filter that eliminates the attributes with none or too much variation for all the instances in the training set. A descriptor that cannot be calculated for an instance represents a missing value in the final vector. For a regression problem, this means that missing values need to be replaced by a number (mean, median, ...). Since this could add more noise to the dataset, we handled this issue by deleting all the attributes that contained at least one instance with a missing value, reducing the dataset to 1 477 attributes.

Then, we made use of the supervised method *CorrelationAttributeEval*, which orders all the attributes by their Pearson's correlation coefficient with the class. The highest correlation of an attribute with the class was 0.25, while the minimum was -0.32. We selected those attributes with correlation values between  $0.1 \leq R \leq -0.1$ , which were 447 attributes.

Next, we applied the filter *InterquartileRange* implemented in Weka to identify instances with extreme values. This method flags a descriptor of an instance as extreme if its value is greater than the 75th quartile or if it is minor than the 25th quartile, by the product of an extreme value factor and the interquartile range. We kept the default value of the filter, *extremeValuesFactor* = 6, and we removed those instances with more than the 5% of the amount of attributes flagged as extreme cases. This way we reduced the training set to 648 instances with 447 attributes.

Finally, for obtaining the best subset of attributes to train the final model, we applied the *WrapperSubsetEval* technique for the selection of attributes. This supervised method evaluates subsets of attributes by training a classifier and assessing its performance in cross-validation. The classifier we used was Support Vector Machine for regression, SMOReg package of Weka, with the polynomial kernel. The selection of the subsets is held by a search method. Here, we employed a genetic algorithm with a population of 20 individuals, crossover and mutation probabilities of 0.6 and 0.033 respectively and 20 generations maximum. Each subset was evaluated in 5-folds cross-validation, and the selection of the best one was carried out attending to the correlation coefficient achieved by the classifier. This step reduced the dataset to 26 structural features to train and test our model. The list of final descriptors can be found in the Supporting Information ppro\_project.idl file. The file can be directly uploaded in ProtDCal-Suite<sup>41</sup> to calculate the descriptors of protein-protein complexes.

**Table SI-3.1.** Descriptors of the protein-protein model.

The evaluation measures are the Pearson's correlation coefficient ( $R$ ), the Spearman's rank correlation coefficient ( $R_S$ ), and the Kendall's ( $R_K$ ) rank correlation coefficient between each descriptor and the binding affinity values.

| Descriptor        | Description                                                                                                      | $R$   | $R_S$ | $R_K$ |
|-------------------|------------------------------------------------------------------------------------------------------------------|-------|-------|-------|
| wNc(ECI)_NO_AHR_G | Geometric mean (G) of the weighted number of contacts (wNc) of the common residues in Alfa Helix structure (AHR) | -0.20 | -0.18 | -0.12 |

|                     |                                                                                                                              |       |       |       |
|---------------------|------------------------------------------------------------------------------------------------------------------------------|-------|-------|-------|
| wNc(ECI)_NO_ALR_G   | Geometric mean (G) of the weighted number of contacts (wNc) of the aliphatic residues (ALR)                                  | -0.17 | -0.16 | -0.11 |
| wNc(Z2)_NO_PLR_V    | Variance (V) of the weighted number of contacts (wNc) of the polar residues (PLR)                                            | -0.11 | -0.05 | -0.03 |
| wNc(Z2)_NO_PCR_G    | Geometric mean (G) of the weighted number of contacts (wNc) of the positive charged residues (PCR)                           | -0.11 | -0.11 | -0.07 |
| wNc(Z3)_NO_GLU_V    | Variance (V) of the weighted number of contacts (wNc) of the glutamic acid residues (GLU)                                    | 0.12  | 0.13  | 0.09  |
| wNc(Z3)_NO_PLR_P2   | Potential mean (P2) of the weighted number of contacts (wNc) of the polar residues (PLR)                                     | 0.15  | 0.19  | 0.13  |
| wNc(Z3)_NO_PRT_P2   | Potential mean (P2) of the weighted number of contacts (wNc) of the whole protein (PRT)                                      | 0.16  | 0.20  | 0.14  |
| wFLC(ECI)_NO_ILE_P2 | Potential mean (P2) of the weighted fraction of local contacts (wFLC) of the isoleucine residues (ILE)                       | 0.16  | 0.19  | 0.14  |
| wFLC(IP)_NO_PCR_Ar  | Arithmetic mean (Ar) of the weighted fraction of local contacts (wFLC) of the positive charged residues (PCR)                | 0.18  | 0.22  | 0.15  |
| wFLC(IP)_NO_PCR_V   | Variance (V) of the weighted fraction of local contacts (wFLC) of the positive charged residues (PCR)                        | 0.12  | 0.14  | 0.11  |
| wFLC(ISA)_NO_PLR_Ar | Arithmetic mean (Ar) of the weighted fraction of local contacts (wFLC) of the polar residues (PLR)                           | 0.18  | 0.22  | 0.17  |
| wNLC(ECI)_NO_AHR_V  | Variance (V) of the weighted number of local contacts (wNLC) of the common residues in Alfa Helix structure (AHR)            | 0.15  | 0.16  | 0.11  |
| wNLC(ECI)_NO_NPR_N1 | Manhattan distance (N1) of the weighted number of local contacts (wNLC) of the nonpolar residues (NPR)                       | -0.15 | -0.20 | -0.13 |
| wNLC(ECI)_NO_NPR_DE | Standard deviation (DE) of the weighted number of local contacts (wNLC) of the nonpolar residues (NPR)                       | -0.15 | -0.16 | -0.10 |
| wNLC(IP)_NO_BSR_N1  | Manhattan distance (N1) of the weighted number of local contacts (wNLC) of the common residues in Beta Sheet structure (BSR) | -0.14 | -0.20 | -0.13 |
| wNLC(IP)_NO_PLR_N1  | Manhattan distance (N1) of the weighted number of local contacts (wNLC) of the polar residues (PLR)                          | -0.12 | -0.18 | -0.12 |
| wNLC(ISA)_NO_BSR_N2 | Euclidean distance (N2) of the weighted number of local contacts (wNLC) of the common residues in Beta Sheet structure (BSR) | -0.13 | -0.15 | -0.10 |
| wNLC(ISA)_NO_PLR_G  | Geometric mean (G) of the weighted number of local contacts (wNLC) of the polar residues (PLR)                               | 0.15  | 0.16  | 0.11  |
| wNLC(Z1)_NO_AHR_DE  | Standard deviation (DE) of the weighted number of local contacts (wNLC) of the common residues in Alfa Helix structure (AHR) | 0.13  | 0.15  | 0.10  |



|                    |                                                                                                                           |       |       |       |
|--------------------|---------------------------------------------------------------------------------------------------------------------------|-------|-------|-------|
| wNLC(Z1)_NO_ALR_N2 | Euclidean distance (N2) of the weighted number of local contacts (wNLC) of the aliphatic residues (ALR)                   | -0.13 | -0.13 | -0.09 |
| wNLC(Z1)_NO_NCR_P2 | Potential mean (P2) of the weighted number of local contacts (wNLC) of the negative charged residues (NCR)                | -0.17 | -0.15 | -0.10 |
| wNLC(Z1)_NO_PRT_Ar | Arithmetic mean (Ar) of the weighted number of local contacts (wNLC) of the whole protein (PRT)                           | -0.16 | -0.15 | -0.10 |
| wNLC(Z2)_NO_BSR_G  | Geometric mean (G) of the weighted number of local contacts (wNLC) of the common residues in Beta Sheet structure (BSR)   | -0.13 | -0.12 | -0.08 |
| wNLC(Z2)_NO_ALR_N1 | Manhattan distance (N1) of the weighted number of local contacts (wNLC) of the aliphatic residues (ALR)                   | -0.32 | -0.29 | -0.20 |
| wNLC(Z3)_NO_AHR_Ar | Arithmetic mean (Ar) of the weighted number of local contacts (wNLC) of the common residues in Alfa Helix structure (AHR) | 0.25  | 0.25  | 0.16  |
| wNLC(Z3)_NO_ALR_Ar | Arithmetic mean (Ar) of the weighted number of local contacts (wNLC) of the aliphatic residues (ALR)                      | 0.14  | 0.13  | 0.09  |

---

The weights of the descriptors are:

- IP: Isoelectric Point
- ECI: Electronic Charge Index
- ISA: Isotropic Surface Area
- Z1: Combined measure of hydrophobicity related properties
- Z2: Combined measure of bulkiness related properties
- Z3: Combined measure of electron related properties

**File SI-1 (separated).** Configuration file for ProtDCal to compute the 26 structural descriptors.

**Figure SI-2.** Distribution of  $\Delta G_{bind}$  values in the four subsets of the training data for the protein-protein ensemble learning protocol.

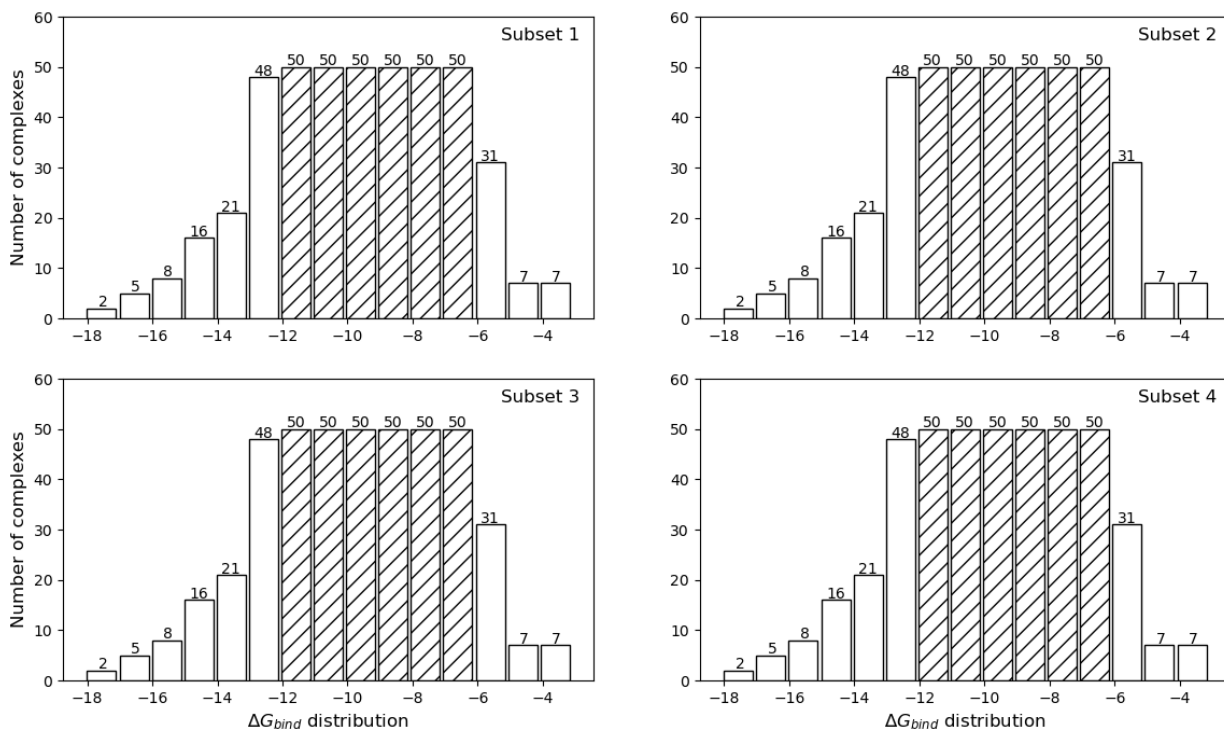

We defined 15 intervals in the scale of  $\Delta G_{bind}$  values, according to the range in the entire data. We filled the intervals with a maximum of 50 instances by sampling (without replacement) the entire dataset. We iterated this procedure to create four subsets, each one containing 445 complexes distributed along the complete range of affinity values. The white bars denote the intervals that were repeated among the four datasets, while the striped bars denote those intervals where the sampling was performed.

**Table SI-3.** Summary of the intermediate models and performance measures for the protein-protein BA modeling during the hyperparameters tuning process.

| <i>Model</i>          | <i>Training subset 1</i> |       |       |       | <i>Training subset 2</i> |       |       |        | <i>Training subset 3</i> |              |              |              | <i>Training subset 4</i> |       |       |        |
|-----------------------|--------------------------|-------|-------|-------|--------------------------|-------|-------|--------|--------------------------|--------------|--------------|--------------|--------------------------|-------|-------|--------|
|                       | TS                       | CV    | DEV   | Score | TS                       | CV    | DEV   | Score  | TS                       | CV           | DEV          | Score        | TS                       | CV    | DEV   | Score  |
| <i>PK_CO.03125_D1</i> | 0,514                    | 0,476 | 0,343 | 0,167 | 0,494                    | 0,441 | 0,331 | 0,148  | 0,517                    | 0,479        | 0,406        | 0,205        | 0,498                    | 0,434 | 0,372 | 0,169  |
| <i>PK_CO.03125_D2</i> | 0,582                    | 0,476 | 0,429 | 0,211 | 0,586                    | 0,455 | 0,468 | 0,222  | 0,588                    | 0,509        | 0,493        | 0,265        | 0,578                    | 0,461 | 0,459 | 0,222  |
| <i>PK_CO.03125_D3</i> | 0,702                    | 0,460 | 0,426 | 0,145 | 0,696                    | 0,418 | 0,484 | 0,161  | 0,709                    | 0,490        | 0,497        | 0,227        | 0,684                    | 0,385 | 0,464 | 0,124  |
| <i>PK_CO.04419_D1</i> | 0,525                    | 0,486 | 0,369 | 0,186 | 0,503                    | 0,446 | 0,342 | 0,156  | 0,527                    | 0,493        | 0,426        | 0,221        | 0,508                    | 0,450 | 0,395 | 0,187  |
| <i>PK_CO.04419_D2</i> | 0,597                    | 0,483 | 0,427 | 0,211 | 0,599                    | 0,464 | 0,486 | 0,235  | <b>0,602</b>             | <b>0,508</b> | <b>0,495</b> | <b>0,266</b> | 0,588                    | 0,468 | 0,470 | 0,230  |
| <i>PK_CO.04419_D3</i> | 0,720                    | 0,461 | 0,440 | 0,146 | 0,713                    | 0,409 | 0,479 | 0,138  | 0,725                    | 0,486        | 0,492        | 0,211        | 0,699                    | 0,374 | 0,446 | 0,087  |
| <i>PK_CO.0625_D1</i>  | 0,534                    | 0,495 | 0,385 | 0,198 | 0,512                    | 0,452 | 0,372 | 0,175  | 0,534                    | 0,501        | 0,433        | 0,228        | 0,514                    | 0,462 | 0,400 | 0,195  |
| <i>PK_CO.0625_D2</i>  | 0,611                    | 0,490 | 0,419 | 0,206 | 0,614                    | 0,463 | 0,492 | 0,236  | 0,618                    | 0,507        | 0,488        | 0,260        | 0,598                    | 0,470 | 0,476 | 0,233  |
| <i>PK_CO.0625_D3</i>  | 0,739                    | 0,462 | 0,455 | 0,147 | 0,731                    | 0,400 | 0,471 | 0,108  | 0,745                    | 0,480        | 0,469        | 0,173        | 0,715                    | 0,365 | 0,442 | 0,060  |
| <i>PK_CO.08838_D1</i> | 0,542                    | 0,492 | 0,411 | 0,212 | 0,522                    | 0,458 | 0,392 | 0,188  | 0,542                    | 0,505        | 0,442        | 0,235        | 0,520                    | 0,470 | 0,405 | 0,201  |
| <i>PK_CO.08838_D2</i> | 0,627                    | 0,494 | 0,419 | 0,202 | 0,632                    | 0,457 | 0,501 | 0,233  | 0,633                    | 0,514        | 0,481        | 0,257        | 0,611                    | 0,461 | 0,478 | 0,227  |
| <i>PK_CO.08838_D3</i> | 0,759                    | 0,465 | 0,462 | 0,142 | 0,751                    | 0,390 | 0,473 | 0,082  | 0,764                    | 0,470        | 0,453        | 0,133        | 0,732                    | 0,358 | 0,445 | 0,041  |
| <i>PK_CO.125_D1</i>   | 0,551                    | 0,493 | 0,417 | 0,216 | 0,531                    | 0,463 | 0,409 | 0,199  | 0,547                    | 0,508        | 0,442        | 0,237        | 0,524                    | 0,474 | 0,406 | 0,202  |
| <i>PK_CO.125_D2</i>   | 0,645                    | 0,494 | 0,416 | 0,193 | 0,649                    | 0,455 | 0,495 | 0,223  | 0,649                    | 0,516        | 0,482        | 0,256        | 0,627                    | 0,453 | 0,479 | 0,217  |
| <i>PK_CO.125_D3</i>   | 0,778                    | 0,466 | 0,464 | 0,129 | 0,774                    | 0,383 | 0,462 | 0,041  | 0,784                    | 0,461        | 0,428        | 0,080        | 0,750                    | 0,354 | 0,444 | 0,016  |
| <i>PK_CO.17677_D1</i> | 0,556                    | 0,501 | 0,410 | 0,215 | 0,539                    | 0,473 | 0,417 | 0,207  | 0,551                    | 0,511        | 0,448        | 0,241        | 0,530                    | 0,470 | 0,423 | 0,210  |
| <i>PK_CO.17677_D2</i> | 0,665                    | 0,494 | 0,411 | 0,180 | 0,661                    | 0,458 | 0,493 | 0,219  | 0,664                    | 0,514        | 0,486        | 0,254        | 0,641                    | 0,444 | 0,471 | 0,201  |
| <i>PK_CO.17677_D3</i> | 0,796                    | 0,462 | 0,452 | 0,094 | 0,794                    | 0,377 | 0,457 | 0,007  | 0,805                    | 0,450        | 0,409        | 0,026        | 0,770                    | 0,342 | 0,450 | -0,015 |
| <i>PK_CO.25_D1</i>    | 0,562                    | 0,506 | 0,409 | 0,216 | 0,547                    | 0,476 | 0,422 | 0,212  | 0,555                    | 0,512        | 0,455        | 0,246        | 0,533                    | 0,468 | 0,438 | 0,217  |
| <i>PK_CO.25_D2</i>    | 0,682                    | 0,496 | 0,408 | 0,169 | 0,672                    | 0,458 | 0,483 | 0,208  | 0,675                    | 0,512        | 0,485        | 0,248        | 0,655                    | 0,435 | 0,465 | 0,185  |
| <i>PK_CO.25_D3</i>    | 0,814                    | 0,454 | 0,442 | 0,057 | 0,815                    | 0,357 | 0,452 | -0,049 | 0,823                    | 0,434        | 0,398        | -0,028       | 0,792                    | 0,327 | 0,435 | -0,075 |
| <i>PK_CO.35355_D1</i> | 0,565                    | 0,513 | 0,427 | 0,230 | 0,554                    | 0,487 | 0,432 | 0,222  | 0,561                    | 0,514        | 0,468        | 0,253        | 0,536                    | 0,465 | 0,452 | 0,222  |
| <i>PK_CO.35355_D2</i> | 0,697                    | 0,495 | 0,411 | 0,163 | 0,684                    | 0,450 | 0,475 | 0,190  | 0,686                    | 0,505        | 0,483        | 0,237        | 0,663                    | 0,415 | 0,459 | 0,159  |
| <i>PK_CO.35355_D3</i> | 0,833                    | 0,444 | 0,438 | 0,020 | 0,834                    | 0,337 | 0,439 | -0,115 | 0,842                    | 0,411        | 0,394        | -0,085       | 0,817                    | 0,318 | 0,430 | -0,126 |
| <i>PK_CO.5_D1</i>     | 0,570                    | 0,521 | 0,438 | 0,240 | 0,560                    | 0,493 | 0,454 | 0,236  | 0,567                    | 0,519        | 0,470        | 0,257        | 0,540                    | 0,462 | 0,461 | 0,226  |
| <i>PK_CO.5_D2</i>     | 0,710                    | 0,490 | 0,424 | 0,163 | 0,695                    | 0,436 | 0,475 | 0,171  | 0,698                    | 0,501        | 0,483        | 0,229        | 0,672                    | 0,394 | 0,452 | 0,130  |

|                       |              |              |              |              |              |              |              |              |       |       |       |        |              |              |              |              |
|-----------------------|--------------|--------------|--------------|--------------|--------------|--------------|--------------|--------------|-------|-------|-------|--------|--------------|--------------|--------------|--------------|
| <i>PK_C0.5_D3</i>     | 0,852        | 0,439        | 0,422        | -0,031       | 0,854        | 0,326        | 0,420        | -0,182       | 0,859 | 0,393 | 0,376 | -0,156 | 0,843        | 0,313        | 0,424        | -0,179       |
| <i>PK_C0.7071_D1</i>  | 0,574        | 0,525        | 0,449        | 0,248        | 0,566        | 0,494        | 0,456        | 0,238        | 0,573 | 0,522 | 0,471 | 0,259  | 0,544        | 0,463        | 0,451        | 0,221        |
| <i>PK_C0.7071_D2</i>  | 0,723        | 0,481        | 0,437        | 0,158        | 0,705        | 0,424        | 0,487        | 0,163        | 0,710 | 0,495 | 0,467 | 0,205  | 0,683        | 0,374        | 0,450        | 0,102        |
| <i>PK_C0.7071_D3</i>  | 0,870        | 0,434        | 0,407        | -0,079       | 0,872        | 0,316        | 0,394        | -0,260       | 0,877 | 0,377 | 0,369 | -0,216 | 0,866        | 0,293        | 0,415        | -0,256       |
| <i>PK_C1.41421_D1</i> | 0,581        | 0,526        | 0,471        | 0,262        | 0,574        | 0,505        | 0,475        | 0,254        | 0,580 | 0,524 | 0,471 | 0,261  | 0,553        | 0,469        | 0,467        | 0,232        |
| <i>PK_C1.41421_D2</i> | 0,751        | 0,472        | 0,448        | 0,140        | 0,733        | 0,394        | 0,493        | 0,119        | 0,739 | 0,476 | 0,416 | 0,122  | 0,702        | 0,354        | 0,427        | 0,048        |
| <i>PK_C1.41421_D3</i> | 0,901        | 0,412        | 0,384        | -0,188       | 0,906        | 0,297        | 0,352        | -0,409       | 0,912 | 0,357 | 0,338 | -0,352 | 0,901        | 0,255        | 0,370        | -0,441       |
| <i>PK_C1_D1</i>       | 0,577        | 0,527        | 0,466        | 0,259        | 0,570        | 0,500        | 0,460        | 0,243        | 0,577 | 0,524 | 0,472 | 0,261  | 0,550        | 0,466        | 0,462        | 0,228        |
| <i>PK_C1_D2</i>       | 0,737        | 0,476        | 0,448        | 0,155        | 0,719        | 0,408        | 0,501        | 0,150        | 0,725 | 0,488 | 0,442 | 0,168  | 0,691        | 0,363        | 0,436        | 0,075        |
| <i>PK_C1_D3</i>       | 0,886        | 0,429        | 0,399        | -0,120       | 0,889        | 0,310        | 0,373        | -0,326       | 0,894 | 0,371 | 0,357 | -0,270 | 0,885        | 0,275        | 0,394        | -0,346       |
| <i>PK_C11.3137_D1</i> | 0,588        | 0,532        | 0,486        | 0,273        | <b>0,581</b> | <b>0,507</b> | <b>0,500</b> | <b>0,268</b> | 0,586 | 0,523 | 0,472 | 0,261  | <b>0,560</b> | <b>0,466</b> | <b>0,483</b> | <b>0,238</b> |
| <i>PK_C11.3137_D2</i> | 0,810        | 0,403        | 0,365        | -0,087       | 0,811        | 0,268        | 0,406        | -0,214       | 0,804 | 0,387 | 0,240 | -0,266 | 0,788        | 0,298        | 0,396        | -0,149       |
| <i>PK_C11.3137_D3</i> | 0,981        | 0,309        | 0,224        | -0,770       | 0,984        | 0,235        | 0,091        | -1,167       | 0,991 | 0,238 | 0,184 | -0,995 | 0,981        | 0,180        | 0,271        | -0,917       |
| <i>PK_C16_D1</i>      | 0,589        | 0,529        | 0,491        | 0,274        | 0,581        | 0,505        | 0,500        | 0,267        | 0,585 | 0,524 | 0,472 | 0,261  | 0,560        | 0,464        | 0,483        | 0,237        |
| <i>PK_C16_D2</i>      | 0,818        | 0,382        | 0,360        | -0,130       | 0,820        | 0,256        | 0,391        | -0,264       | 0,812 | 0,363 | 0,199 | -0,368 | 0,796        | 0,286        | 0,381        | -0,195       |
| <i>PK_C16_D3</i>      | 0,989        | 0,296        | 0,218        | -0,826       | 0,991        | 0,225        | 0,059        | -1,274       | 0,996 | 0,224 | 0,159 | -1,085 | 0,989        | 0,163        | 0,231        | -1,045       |
| <i>PK_C2.82842_D1</i> | 0,586        | 0,528        | 0,487        | 0,271        | 0,579        | 0,511        | 0,489        | 0,264        | 0,587 | 0,524 | 0,475 | 0,263  | 0,558        | 0,467        | 0,473        | 0,234        |
| <i>PK_C2.82842_D2</i> | 0,772        | 0,451        | 0,410        | 0,062        | 0,755        | 0,367        | 0,454        | 0,035        | 0,764 | 0,450 | 0,375 | 0,030  | 0,729        | 0,336        | 0,443        | 0,016        |
| <i>PK_C2.82842_D3</i> | 0,933        | 0,368        | 0,330        | -0,387       | 0,938        | 0,272        | 0,295        | -0,604       | 0,941 | 0,335 | 0,283 | -0,532 | 0,932        | 0,215        | 0,346        | -0,609       |
| <i>PK_C2_D1</i>       | 0,584        | 0,529        | 0,486        | 0,271        | 0,574        | 0,509        | 0,480        | 0,258        | 0,586 | 0,525 | 0,473 | 0,262  | 0,555        | 0,469        | 0,467        | 0,232        |
| <i>PK_C2_D2</i>       | 0,762        | 0,466        | 0,435        | 0,113        | 0,745        | 0,380        | 0,469        | 0,073        | 0,752 | 0,463 | 0,390 | 0,072  | 0,715        | 0,347        | 0,432        | 0,032        |
| <i>PK_C2_D3</i>       | 0,918        | 0,387        | 0,361        | -0,283       | 0,923        | 0,282        | 0,326        | -0,507       | 0,929 | 0,343 | 0,305 | -0,457 | 0,916        | 0,235        | 0,357        | -0,524       |
| <i>PK_C4_D1</i>       | 0,587        | 0,533        | 0,488        | 0,275        | 0,582        | 0,511        | 0,492        | 0,266        | 0,586 | 0,527 | 0,470 | 0,262  | 0,559        | 0,465        | 0,472        | 0,232        |
| <i>PK_C4_D2</i>       | 0,784        | 0,440        | 0,382        | 0,007        | 0,767        | 0,344        | 0,442        | -0,017       | 0,776 | 0,436 | 0,349 | -0,027 | 0,746        | 0,330        | 0,443        | -0,009       |
| <i>PK_C4_D3</i>       | 0,946        | 0,350        | 0,305        | -0,481       | 0,951        | 0,258        | 0,246        | -0,742       | 0,955 | 0,315 | 0,266 | -0,622 | 0,946        | 0,208        | 0,339        | -0,665       |
| <i>PK_C5.65685_D1</i> | <b>0,588</b> | <b>0,533</b> | <b>0,488</b> | <b>0,275</b> | 0,580        | 0,506        | 0,495        | 0,265        | 0,588 | 0,525 | 0,474 | 0,263  | 0,560        | 0,468        | 0,474        | 0,235        |
| <i>PK_C5.65685_D2</i> | 0,796        | 0,428        | 0,364        | -0,041       | 0,781        | 0,313        | 0,428        | -0,087       | 0,787 | 0,421 | 0,323 | -0,089 | 0,761        | 0,321        | 0,439        | -0,040       |
| <i>PK_C5.65685_D3</i> | 0,958        | 0,342        | 0,268        | -0,583       | 0,964        | 0,249        | 0,199        | -0,875       | 0,968 | 0,291 | 0,238 | -0,743 | 0,959        | 0,198        | 0,329        | -0,731       |
| <i>PK_C8_D1</i>       | 0,588        | 0,533        | 0,486        | 0,274        | 0,581        | 0,507        | 0,495        | 0,266        | 0,587 | 0,525 | 0,478 | 0,265  | 0,560        | 0,468        | 0,480        | 0,238        |
| <i>PK_C8_D2</i>       | 0,803        | 0,414        | 0,368        | -0,061       | 0,798        | 0,284        | 0,424        | -0,152       | 0,796 | 0,403 | 0,288 | -0,168 | 0,774        | 0,309        | 0,419        | -0,091       |
| <i>PK_C8_D3</i>       | 0,970        | 0,327        | 0,237        | -0,692       | 0,974        | 0,242        | 0,138        | -1,032       | 0,981 | 0,260 | 0,214 | -0,874 | 0,970        | 0,192        | 0,308        | -0,804       |

**Table SI-4.** Summary of the performance of the individual and the ensemble models for protein-protein models.

The models M1, M2, M3 and M4 correspond to the best predictors obtained from the training subsets 1, 2, 3 and 4 respectively. Then, the correlation coefficients (R) of the estimations in the development set were calculated for each model (R\_IND), as well as all possible combinations of the models. The combination rules were the average (V\_AVG), maximum (V\_MAX), and minimum, (V\_MIN) predictions. The optimal ensemble model corresponds to the model that outputs the binding affinity based on the minimum predicted value between the models obtained from the training subsets 2 and 3.

| <i>Ensemble</i> | <i>Model</i> | <i>R_IND</i> | <i>V_AVG</i> | <i>V_MAX</i> | <i>V_MIN</i> |
|-----------------|--------------|--------------|--------------|--------------|--------------|
| 1               | M1           | 0,488        | 0,501        | 0,508        | 0,489        |
|                 | M2           | 0,500        |              |              |              |
| 2               | M1           | 0,488        | 0,505        | 0,479        | 0,520        |
|                 | M3           | 0,495        |              |              |              |
| 3               | M1           | 0,488        | 0,491        | 0,482        | 0,497        |
|                 | M4           | 0,482        |              |              |              |
| 4               | M2           | 0,500        | 0,508        | 0,480        | <b>0,526</b> |
|                 | M3           | 0,495        |              |              |              |
| 5               | M2           | 0,500        | 0,496        | 0,496        | 0,493        |
|                 | M4           | 0,482        |              |              |              |
| 6               | M3           | 0,495        | 0,500        | 0,483        | 0,508        |
|                 | M4           | 0,482        |              |              |              |
| 7               | M1           | 0,488        | 0,508        | 0,482        | 0,517        |
|                 | M2           | 0,500        |              |              |              |
|                 | M3           | 0,495        |              |              |              |
| 8               | M1           | 0,488        | 0,498        | 0,496        | 0,492        |
|                 | M2           | 0,500        |              |              |              |
|                 | M4           | 0,482        |              |              |              |
| 9               | M1           | 0,488        | 0,502        | 0,479        |              |
|                 | M3           | 0,495        |              |              |              |
|                 | M4           | 0,482        |              |              |              |
| 10              | M2           | 0,500        | 0,505        | 0,473        | 0,507        |
|                 | M3           | 0,495        |              |              |              |
|                 | M4           | 0,482        |              |              |              |
| 11              | M1           | 0,488        | 0,505        | 0,479        | 0,508        |
|                 | M2           | 0,500        |              |              |              |
|                 | M3           | 0,495        |              |              |              |
|                 | M4           | 0,482        |              |              |              |

**Figure SI-3.** Characterization of the dataset of protein-peptide complexes used in this work.

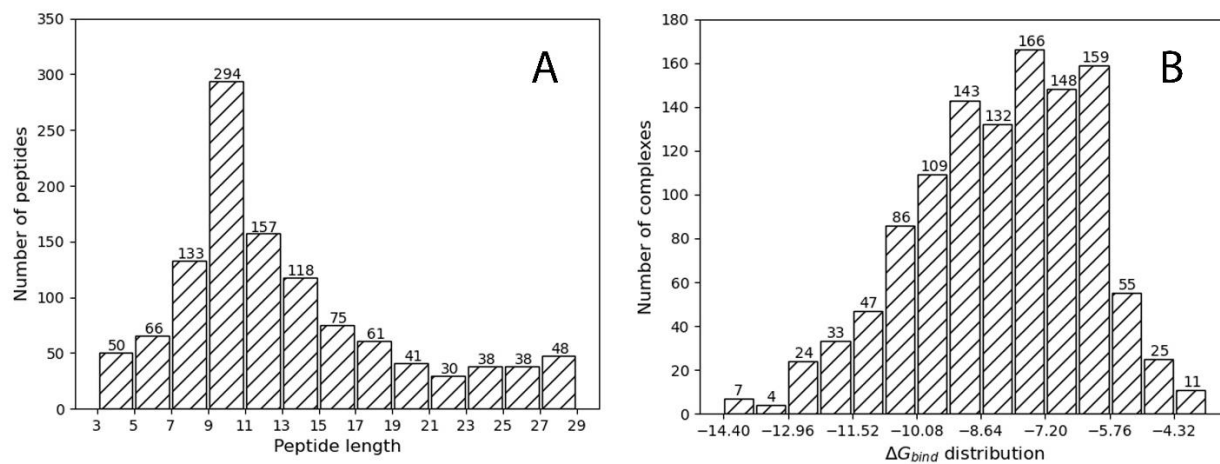

The distribution of the peptide lengths (number of residues) in the dataset is presented in panel A, while panel B shows the distribution of  $\Delta G$  values across all the protein-peptide complexes contained in the dataset.

#### Section SI-4. Description of the process of feature selection for creating the protein-peptide model.

Here, we followed the pipeline described in section SI-2 for selecting the attributes of the final model. Starting with a matrix of 949 instances x 23 040 descriptors generated with ProtDCA, we reduced the matrix dimensionality to 8 999 attributes by applying the filter *RemoveUseless*. Then, we deleted all the attributes that contained at least one instance with a missing value, reducing the dataset to 2 358 attributes. In a third step, we made use of the supervised method *CorrelationAttributeEval*, for correlating each attribute with the class. The highest correlation obtained was 0.24 and the minimum -0.23. We selected those attributes with correlation values between  $0.1 \leq R \leq -0.1$  that were 631 attributes.

At this point, after decreasing the dimensionality of the problem by more than 95%, we applied the filter *InterquartileRange* implemented in Weka to identify instances with extreme values. We kept the default value of the filter, which is the extremeValuesFactor = 6 and we removed those instances with more than the 5% of number of attributes flagged as extreme cases. This way we reduced the training set to 922 instances with 631 attributes.

Finally, for obtaining the best subset of attributes to train the final model we applied the *WrapperSubsetEval* attribute selection technique. The classifier we used was support vector machine for regression with the lineal kernel and the search method a genetic algorithm with a population of 20 individuals, crossover and mutation probabilities of 0.6 and 0.033 respectively and 20 generations maximum. Each subset was evaluated in 5-folds cross-validation, and the selection of the best subset was attending to the correlation coefficient achieved by the classifier. This step reduced the dataset to 37 structural features to train and test the models.

**Table SI-4.1.** Descriptors of the protein-peptide model.

The evaluation measures are the Pearson's correlation coefficient ( $R$ ), the Spearman's rank correlation coefficient ( $R_S$ ), and the Kendall's ( $R_K$ ) rank correlation coefficient between each descriptor and the binding affinity values.

| Descriptor         | Description                                                                                                           | $R$   | $R_S$ | $R_K$ |
|--------------------|-----------------------------------------------------------------------------------------------------------------------|-------|-------|-------|
| wNc(ECI)_NO_AHR_N1 | Manhattan distance (N1) of the weighted number of contacts (wNc) of the common residues in Alfa Helix structure (AHR) | -0.20 | -0.17 | -0.11 |
| wNc(ECI)_NO_ALR_N1 | Manhattan distance (N1) of the weighted number of contacts (wNc) of the aliphatic residues (ALR)                      | -0.13 | -0.05 | -0.04 |
| wNc(IP)_NO_PLR_N1  | Manhattan distance (N1) of the weighted number of contacts (wNc) of the polar residues (PLR)                          | -0.13 | -0.12 | -0.08 |
| wNc(ISA)_NO_PLR_V  | Variance (V) of the weighted number of contacts (wNc) of the polar residues (PLR)                                     | 0.10  | 0.10  | 0.06  |
| wNc(Z1)_NO_NPR_N2  | Euclidean distance (N2) of the weighted number of contacts (wNc) of the nonpolar residues (NPR)                       | -0.19 | -0.17 | -0.12 |

|                       |                                                                                                                                                |       |       |       |
|-----------------------|------------------------------------------------------------------------------------------------------------------------------------------------|-------|-------|-------|
| wNc(Z1)_NO_ARM_V      | Variance (V) of the weighted number of contacts (wNc) of the aromatic residues (ARM)                                                           | -0.11 | -0.05 | -0.04 |
| wNc(Z1)_NO_PRT_N1     | Manhattan distance (N1) of the weighted number of contacts (wNc) of the whole protein (PRT)                                                    | -0.12 | -0.11 | -0.07 |
| wNc(Z3)_NO_AHR_N1     | Manhattan distance (N1) of the weighted number of contacts (wNc) of the common residues in Alfa Helix structure (AHR)                          | -0.17 | -0.11 | -0.07 |
| wNc(Z3)_NO_UCR_N1     | Manhattan distance (N1) of the weighted number of contacts (wNc) of the uncharged residues (UCR)                                               | -0.13 | -0.07 | -0.04 |
| wFLC(ECI)_NO_AHR_SI30 | Standardized Information Content (SI30) of the weighted fraction of local contacts (wFLC) of the common residues in Alfa Helix structure (AHR) | 0.16  | 0.15  | 0.10  |
| wFLC(ECI)_NO_PCR_V    | Variance (V) of the weighted fraction of local contacts (wFLC) of the positive charged residues (PCR)                                          | 0.11  | 0.09  | 0.07  |
| wFLC(IP)_NO_RTR_MI30  | Mean Information Content (MI30) of the weighted fraction of local contacts (wFLC) of the common residues in reverse turn (RTR)                 | 0.12  | 0.07  | 0.05  |
| wFLC(IP)_NO_BSR_Ar    | Arithmetic mean (Ar) of the weighted fraction of local contacts (wFLC) of the common residues in Beta Sheet structure (BSR)                    | 0.11  | 0.17  | 0.12  |
| wFLC(IP)_NO_UCR_RA    | Range (RA) of the weighted fraction of local contacts (wFLC) of the uncharged residues (UCR)                                                   | 0.13  | 0.12  | 0.09  |
| wFLC(IP)_NO_UCR_K     | Kurtosis (K) of the weighted fraction of local contacts (wFLC) of the uncharged residues (UCR)                                                 | -0.17 | -0.21 | -0.14 |
| wFLC(IP)_NO_PRT_TI30  | Total content (TI30) of the weighted fraction of local contacts (wFLC) of the whole protein (PRT)                                              | -0.20 | -0.22 | -0.15 |
| wFLC(ISA)_NO_NPR_P2   | Potential mean (P2) of the weighted fraction of local contacts (wFLC) of the nonpolar residues (NPR)                                           | 0.24  | 0.26  | 0.18  |
| wFLC(ISA)_NO_NPR_DE   | Standard deviation (DE) of the weighted fraction of local contacts (wFLC) of the nonpolar residues (NPR)                                       | 0.24  | 0.27  | 0.18  |
| wFLC(ISA)_NO_PRT_TI30 | Total content (TI30) of the weighted fraction of local contacts (wFLC) of the whole protein (PRT)                                              | -0.19 | -0.20 | -0.13 |
| wFLC(Z1)_NO_BSR_SI30  | Standardized Information Content (SI30) of the weighted fraction of local contacts (wFLC) of the common residues in Beta Sheet structure (BSR) | 0.20  | 0.22  | 0.14  |
| wFLC(Z2)_NO_PLR_K     | Kurtosis (K) of the weighted fraction of local contacts (wFLC) of the polar residues (PLR)                                                     | -0.12 | -0.15 | -0.10 |
| wNLC(ECI)_NO_BSR_I50  | Interquartile range (I50) of the weighted number of local contacts (wNLC) of the                                                               | -0.10 | -0.09 | -0.06 |



|                      |                                                                                                                                      |       |       |       |
|----------------------|--------------------------------------------------------------------------------------------------------------------------------------|-------|-------|-------|
|                      | common residues in Beta Sheet structure (BSR)                                                                                        |       |       |       |
| wNLC(ECI)_NO_PLR_K   | Kurtosis (K) of the weighted number of local contacts (wNLC) of the polar residues (PLR)                                             | -0.12 | -0.17 | -0.11 |
| wNLC(ECI)_NO_UCR_S   | Skewness (S) of the weighted number of local contacts (wNLC) of the uncharged residues (UCR)                                         | -0.14 | -0.13 | -0.09 |
| wNLC(IP)_NO_RTR_V    | Variance (V) of the weighted number of local contacts (wNLC) of the common residues in reverse turn (RTR)                            | 0.11  | 0.09  | 0.06  |
| wNLC(IP)_NO_UCR_I50  | Interquartile range (I50) of the weighted number of local contacts (wNLC) of the uncharged residues (UCR)                            | -0.12 | -0.09 | -0.06 |
| wNLC(ISA)_NO_UCR_S   | Skewness (S) of the weighted number of local contacts (wNLC) of the uncharged residues (UCR)                                         | -0.20 | -0.22 | -0.14 |
| wNLC(Z1)_NO_RTR_SI30 | Standardized Information Content (SI30) of the weighted number of local contacts (wNLC) of the common residues in reverse turn (RTR) | 0.12  | 0.13  | 0.09  |
| wNLC(Z1)_NO_BSR_K    | Kurtosis (K) of the weighted number of local contacts (wNLC) of the common residues in Beta Sheet structure (BSR)                    | -0.10 | -0.17 | -0.11 |
| wNLC(Z1)_NO_UCR_K    | Kurtosis (K) of the weighted number of local contacts (wNLC) of the uncharged residues (UCR)                                         | -0.13 | -0.17 | -0.11 |
| wNLC(Z2)_NO_AHR_P2   | Potential mean (P2) of the weighted number of local contacts (wNLC) of the common residues in Alfa Helix structure (AHR)             | -0.17 | -0.19 | -0.13 |
| wNLC(Z2)_NO_PCR_N2   | Euclidean distance (N2) of the weighted number of local contacts (wNLC) of the positive charged residues (PCR)                       | -0.15 | -0.15 | -0.10 |
| wNLC(Z2)_NO_NCR_P2   | Potential mean (P2) of the weighted number of local contacts (wNLC) of the negative charged residues (NCR)                           | -0.11 | -0.09 | -0.06 |
| wNLC(Z2)_NO_UCR_K    | Kurtosis (K) of the weighted number of local contacts (wNLC) of the uncharged residues (UCR)                                         | -0.11 | -0.17 | -0.12 |
| wNLC(Z3)_NO_PLR_SI30 | Standardized Information Content (SI30) of the weighted number of local contacts (wNLC) of the polar residues (PLR)                  | 0.12  | 0.13  | 0.08  |
| wNLC(Z3)_NO_NCR_RA   | Range (RA) of the weighted number of local contacts (wNLC) of the negative charged residues (NCR)                                    | -0.13 | -0.15 | -0.10 |
| wNLC(Z3)_NO_UCR_TI30 | Total content (TI) of the weighted number of local contacts (wNLC) of the uncharged residues (UCR)                                   | -0.19 | -0.20 | -0.14 |

**File SI-2 (separated).** Configuration file for ProtDCAI to compute the 37 structural descriptors.

**Figure SI-4.** Distribution of  $\Delta G_{bind}$  values in the four subsets of the training data for the protein-peptide ensemble learning protocol.

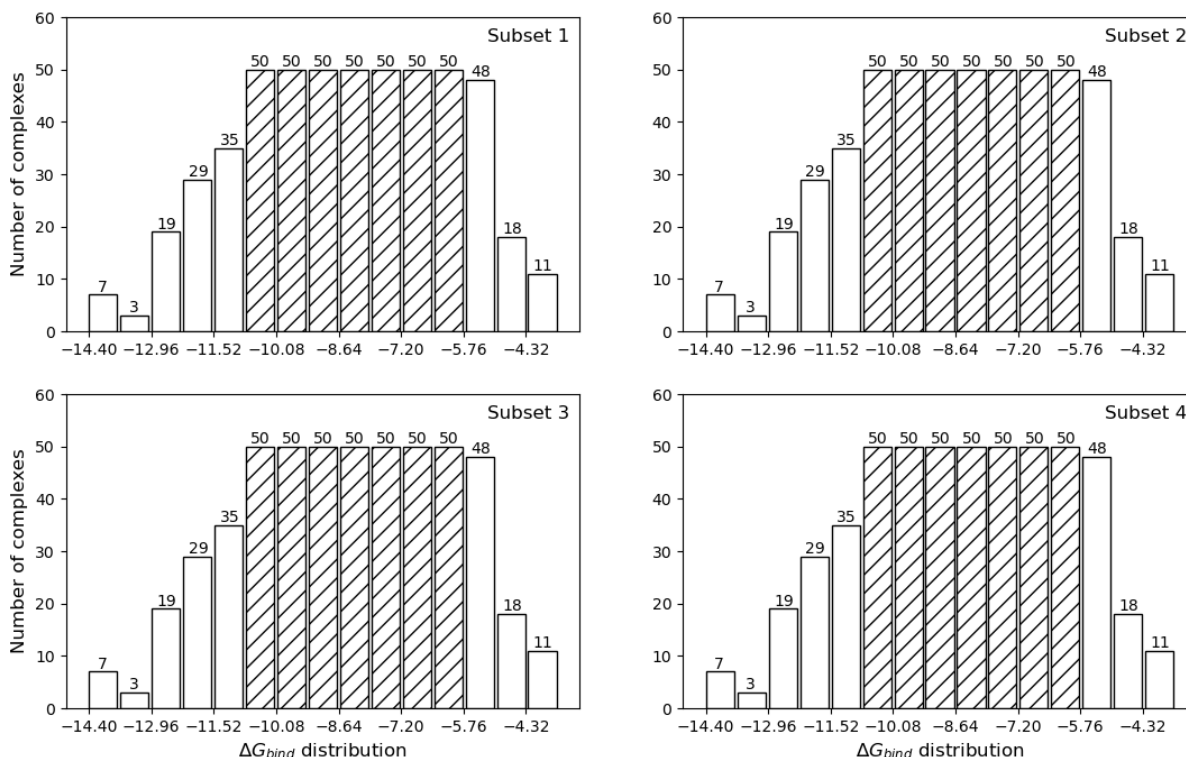

We defined 15 intervals in the scale of  $\Delta G_{bind}$  values, according to the range in the entire data. Then, we filled the intervals with a maximum of 50 instances by sampling (without replacement) the entire dataset. We iterated this procedure to create four subsets, each one containing 520 complexes distributed along the complete range of affinity values. The white bars denote the intervals that were repeated among the four datasets, while the striped bars denote those intervals where the sampling was performed.

**Table SI-5.** Summary of the intermediate models and performance measures for the protein-peptide modeling during the hyperparameters tuning process.

| <i>Model</i>            | <i>Training 1</i> |              |              |              | <i>Training 2</i> |              |              |              | <i>Training 3</i> |              |              |              | <i>Training 4</i> |              |              |              |
|-------------------------|-------------------|--------------|--------------|--------------|-------------------|--------------|--------------|--------------|-------------------|--------------|--------------|--------------|-------------------|--------------|--------------|--------------|
|                         | <b>TS</b>         | <b>CV</b>    | <b>DEV</b>   | <b>Score</b> |
| <i>PK_C0.0078125_D1</i> | 0,503             | 0,463        | 0,481        | 0,230        | 0,480             | 0,441        | 0,406        | 0,189        | 0,494             | 0,448        | 0,430        | 0,203        | 0,494             | 0,464        | 0,412        | 0,201        |
| <i>PK_C0.0078125_D2</i> | 0,636             | 0,574        | 0,529        | 0,321        | 0,625             | 0,549        | 0,539        | 0,313        | 0,630             | 0,550        | 0,519        | 0,302        | 0,639             | 0,577        | 0,505        | 0,307        |
| <i>PK_C0.0078125_D3</i> | 0,735             | 0,586        | 0,465        | 0,259        | 0,728             | 0,535        | 0,506        | 0,261        | 0,726             | 0,549        | 0,556        | 0,313        | 0,722             | 0,539        | 0,555        | 0,305        |
| <i>PK_C0.0110485_D1</i> | 0,529             | 0,486        | 0,495        | 0,250        | 0,507             | 0,468        | 0,437        | 0,215        | 0,522             | 0,468        | 0,449        | 0,222        | 0,517             | 0,484        | 0,440        | 0,223        |
| <i>PK_C0.0110485_D2</i> | 0,644             | 0,578        | 0,527        | 0,322        | 0,637             | 0,557        | 0,546        | 0,322        | 0,642             | 0,557        | 0,525        | 0,309        | 0,648             | 0,578        | 0,518        | 0,316        |
| <i>PK_C0.0110485_D3</i> | 0,755             | 0,586        | 0,467        | 0,251        | 0,746             | 0,528        | 0,490        | 0,233        | 0,748             | 0,538        | 0,558        | 0,297        | 0,740             | 0,529        | 0,550        | 0,287        |
| <i>PK_C0.015625_D1</i>  | 0,555             | 0,510        | 0,499        | 0,267        | 0,531             | 0,489        | 0,463        | 0,238        | 0,549             | 0,492        | 0,452        | 0,235        | 0,545             | 0,502        | 0,462        | 0,244        |
| <i>PK_C0.015625_D2</i>  | <b>0,654</b>      | <b>0,581</b> | <b>0,527</b> | <b>0,324</b> | <b>0,650</b>      | <b>0,564</b> | <b>0,539</b> | <b>0,322</b> | 0,653             | 0,562        | 0,533        | 0,317        | 0,657             | 0,578        | 0,524        | 0,320        |
| <i>PK_C0.015625_D3</i>  | 0,777             | 0,581        | 0,468        | 0,237        | 0,764             | 0,524        | 0,481        | 0,209        | 0,770             | 0,526        | 0,565        | 0,283        | 0,760             | 0,521        | 0,550        | 0,271        |
| <i>PK_C0.022097_D1</i>  | 0,575             | 0,532        | 0,503        | 0,281        | 0,555             | 0,504        | 0,485        | 0,257        | 0,573             | 0,509        | 0,453        | 0,243        | 0,569             | 0,523        | 0,479        | 0,264        |
| <i>PK_C0.022097_D2</i>  | 0,664             | 0,583        | 0,521        | 0,320        | 0,661             | 0,564        | 0,537        | 0,320        | 0,666             | 0,563        | 0,538        | 0,320        | 0,665             | 0,576        | 0,526        | 0,320        |
| <i>PK_C0.022097_D3</i>  | 0,798             | 0,571        | 0,472        | 0,218        | 0,786             | 0,521        | 0,467        | 0,178        | 0,792             | 0,512        | 0,563        | 0,256        | 0,782             | 0,513        | 0,565        | 0,264        |
| <i>PK_C0.03125_D1</i>   | 0,592             | 0,542        | 0,507        | 0,290        | 0,574             | 0,523        | 0,492        | 0,271        | 0,586             | 0,526        | 0,467        | 0,259        | 0,587             | 0,539        | 0,478        | 0,272        |
| <i>PK_C0.03125_D2</i>   | 0,678             | 0,585        | 0,521        | 0,320        | 0,671             | 0,561        | 0,535        | 0,316        | <b>0,678</b>      | <b>0,562</b> | <b>0,543</b> | <b>0,322</b> | <b>0,675</b>      | <b>0,570</b> | <b>0,532</b> | <b>0,320</b> |
| <i>PK_C0.03125_D3</i>   | 0,818             | 0,562        | 0,470        | 0,193        | 0,807             | 0,517        | 0,465        | 0,156        | 0,813             | 0,497        | 0,565        | 0,229        | 0,802             | 0,502        | 0,575        | 0,250        |
| <i>PK_C0.0441941_D1</i> | 0,601             | 0,551        | 0,504        | 0,292        | 0,584             | 0,535        | 0,502        | 0,282        | 0,596             | 0,537        | 0,465        | 0,263        | 0,595             | 0,548        | 0,477        | 0,275        |
| <i>PK_C0.0441941_D2</i> | 0,694             | 0,588        | 0,517        | 0,317        | 0,685             | 0,559        | 0,540        | 0,317        | 0,692             | 0,561        | 0,546        | 0,321        | 0,685             | 0,563        | 0,537        | 0,317        |
| <i>PK_C0.0441941_D3</i> | 0,837             | 0,554        | 0,448        | 0,144        | 0,830             | 0,512        | 0,475        | 0,139        | 0,835             | 0,492        | 0,551        | 0,194        | 0,821             | 0,487        | 0,587        | 0,234        |
| <i>PK_C0.0625_D1</i>    | 0,605             | 0,556        | 0,500        | 0,293        | 0,592             | 0,543        | 0,515        | 0,294        | 0,600             | 0,543        | 0,455        | 0,259        | 0,602             | 0,551        | 0,490        | 0,285        |
| <i>PK_C0.0625_D2</i>    | 0,713             | 0,591        | 0,516        | 0,314        | 0,701             | 0,555        | 0,536        | 0,308        | 0,707             | 0,555        | 0,543        | 0,312        | 0,698             | 0,553        | 0,546        | 0,315        |
| <i>PK_C0.0625_D3</i>    | 0,856             | 0,542        | 0,423        | 0,082        | 0,853             | 0,507        | 0,466        | 0,102        | 0,854             | 0,493        | 0,544        | 0,170        | 0,840             | 0,471        | 0,585        | 0,199        |
| <i>PK_C0.0883883_D1</i> | 0,607             | 0,558        | 0,505        | 0,297        | 0,597             | 0,547        | 0,515        | 0,297        | 0,604             | 0,545        | 0,460        | 0,263        | 0,612             | 0,556        | 0,484        | 0,284        |
| <i>PK_C0.0883883_D2</i> | 0,732             | 0,598        | 0,511        | 0,310        | 0,718             | 0,547        | 0,505        | 0,274        | 0,725             | 0,547        | 0,537        | 0,297        | 0,714             | 0,543        | 0,550        | 0,306        |
| <i>PK_C0.0883883_D3</i> | 0,874             | 0,525        | 0,436        | 0,060        | 0,874             | 0,498        | 0,439        | 0,033        | 0,873             | 0,493        | 0,508        | 0,112        | 0,858             | 0,460        | 0,579        | 0,163        |
| <i>PK_C0.125_D1</i>     | 0,610             | 0,561        | 0,505        | 0,299        | 0,605             | 0,557        | 0,504        | 0,296        | 0,607             | 0,545        | 0,476        | 0,274        | 0,617             | 0,563        | 0,471        | 0,279        |
| <i>PK_C0.125_D2</i>     | 0,749             | 0,602        | 0,502        | 0,299        | 0,734             | 0,540        | 0,472        | 0,232        | 0,742             | 0,541        | 0,526        | 0,277        | 0,730             | 0,528        | 0,537        | 0,280        |

|                          |       |       |       |        |       |       |       |        |       |       |       |        |       |       |       |        |
|--------------------------|-------|-------|-------|--------|-------|-------|-------|--------|-------|-------|-------|--------|-------|-------|-------|--------|
| <i>PK_C0.125_D3</i>      | 0,893 | 0,512 | 0,488 | 0,088  | 0,895 | 0,486 | 0,413 | -0,041 | 0,891 | 0,492 | 0,479 | 0,056  | 0,877 | 0,456 | 0,553 | 0,113  |
| <i>PK_C0.1767766_D1</i>  | 0,613 | 0,564 | 0,508 | 0,302  | 0,610 | 0,562 | 0,500 | 0,296  | 0,614 | 0,548 | 0,489 | 0,282  | 0,621 | 0,575 | 0,465 | 0,280  |
| <i>PK_C0.1767766_D2</i>  | 0,767 | 0,596 | 0,488 | 0,273  | 0,751 | 0,537 | 0,450 | 0,199  | 0,759 | 0,535 | 0,503 | 0,244  | 0,746 | 0,515 | 0,537 | 0,263  |
| <i>PK_C0.1767766_D3</i>  | 0,911 | 0,494 | 0,537 | 0,106  | 0,914 | 0,473 | 0,404 | -0,098 | 0,907 | 0,484 | 0,480 | 0,028  | 0,895 | 0,454 | 0,466 | -0,013 |
| <i>PK_C0.25_D1</i>       | 0,615 | 0,562 | 0,508 | 0,301  | 0,613 | 0,565 | 0,500 | 0,297  | 0,617 | 0,550 | 0,487 | 0,283  | 0,623 | 0,577 | 0,467 | 0,282  |
| <i>PK_C0.25_D2</i>       | 0,786 | 0,590 | 0,480 | 0,251  | 0,766 | 0,535 | 0,435 | 0,171  | 0,778 | 0,524 | 0,501 | 0,221  | 0,763 | 0,501 | 0,540 | 0,244  |
| <i>PK_C0.25_D3</i>       | 0,926 | 0,477 | 0,525 | 0,049  | 0,931 | 0,460 | 0,382 | -0,174 | 0,925 | 0,469 | 0,524 | 0,039  | 0,911 | 0,446 | 0,413 | -0,116 |
| <i>PK_C0.3535533_D1</i>  | 0,616 | 0,561 | 0,503 | 0,298  | 0,613 | 0,565 | 0,505 | 0,301  | 0,620 | 0,554 | 0,488 | 0,285  | 0,624 | 0,573 | 0,472 | 0,284  |
| <i>PK_C0.3535533_D2</i>  | 0,805 | 0,582 | 0,464 | 0,214  | 0,784 | 0,527 | 0,432 | 0,148  | 0,800 | 0,511 | 0,525 | 0,216  | 0,781 | 0,485 | 0,554 | 0,229  |
| <i>PK_C0.3535533_D3</i>  | 0,940 | 0,463 | 0,513 | -0,002 | 0,944 | 0,454 | 0,366 | -0,229 | 0,943 | 0,447 | 0,618 | 0,095  | 0,927 | 0,437 | 0,374 | -0,210 |
| <i>PK_C0.5_D1</i>        | 0,619 | 0,564 | 0,501 | 0,298  | 0,612 | 0,562 | 0,501 | 0,297  | 0,622 | 0,554 | 0,493 | 0,289  | 0,624 | 0,569 | 0,476 | 0,285  |
| <i>PK_C0.5_D2</i>        | 0,821 | 0,571 | 0,459 | 0,187  | 0,803 | 0,518 | 0,439 | 0,130  | 0,817 | 0,499 | 0,556 | 0,220  | 0,798 | 0,469 | 0,557 | 0,204  |
| <i>PK_C0.5_D3</i>        | 0,951 | 0,451 | 0,526 | -0,018 | 0,954 | 0,453 | 0,340 | -0,290 | 0,956 | 0,428 | 0,660 | 0,098  | 0,941 | 0,428 | 0,350 | -0,285 |
| <i>PK_C0.7071067_D1</i>  | 0,620 | 0,569 | 0,498 | 0,298  | 0,613 | 0,560 | 0,502 | 0,297  | 0,623 | 0,554 | 0,494 | 0,289  | 0,626 | 0,566 | 0,490 | 0,292  |
| <i>PK_C0.7071067_D2</i>  | 0,835 | 0,562 | 0,447 | 0,154  | 0,822 | 0,506 | 0,447 | 0,108  | 0,833 | 0,493 | 0,579 | 0,223  | 0,813 | 0,451 | 0,567 | 0,181  |
| <i>PK_C0.7071067_D3</i>  | 0,962 | 0,434 | 0,500 | -0,093 | 0,963 | 0,447 | 0,298 | -0,385 | 0,967 | 0,408 | 0,612 | -0,001 | 0,955 | 0,410 | 0,322 | -0,381 |
| <i>PK_C1.4142135_D1</i>  | 0,622 | 0,568 | 0,497 | 0,297  | 0,614 | 0,554 | 0,496 | 0,290  | 0,625 | 0,549 | 0,503 | 0,292  | 0,630 | 0,563 | 0,505 | 0,300  |
| <i>PK_C1.4142135_D2</i>  | 0,864 | 0,532 | 0,441 | 0,086  | 0,858 | 0,487 | 0,421 | 0,018  | 0,860 | 0,486 | 0,559 | 0,174  | 0,843 | 0,418 | 0,577 | 0,125  |
| <i>PK_C1.4142135_D3</i>  | 0,980 | 0,390 | 0,507 | -0,179 | 0,974 | 0,430 | 0,261 | -0,498 | 0,983 | 0,370 | 0,586 | -0,115 | 0,973 | 0,372 | 0,298 | -0,517 |
| <i>PK_C1_D1</i>          | 0,622 | 0,569 | 0,498 | 0,299  | 0,612 | 0,557 | 0,501 | 0,295  | 0,624 | 0,549 | 0,503 | 0,292  | 0,628 | 0,564 | 0,497 | 0,296  |
| <i>PK_C1_D2</i>          | 0,850 | 0,549 | 0,436 | 0,113  | 0,841 | 0,497 | 0,445 | 0,078  | 0,847 | 0,494 | 0,580 | 0,215  | 0,827 | 0,430 | 0,580 | 0,157  |
| <i>PK_C1_D3</i>          | 0,972 | 0,413 | 0,516 | -0,119 | 0,969 | 0,444 | 0,270 | -0,450 | 0,976 | 0,386 | 0,578 | -0,088 | 0,965 | 0,387 | 0,305 | -0,463 |
| <i>PK_C11.3137084_D1</i> | 0,623 | 0,559 | 0,480 | 0,282  | 0,615 | 0,552 | 0,481 | 0,280  | 0,624 | 0,551 | 0,502 | 0,292  | 0,633 | 0,563 | 0,503 | 0,299  |
| <i>PK_C11.3137084_D2</i> | 0,935 | 0,382 | 0,504 | -0,124 | 0,944 | 0,391 | 0,417 | -0,243 | 0,939 | 0,372 | 0,453 | -0,214 | 0,931 | 0,361 | 0,482 | -0,178 |
| <i>PK_C11.3137084_D3</i> | 0,994 | 0,336 | 0,431 | -0,406 | 0,991 | 0,336 | 0,236 | -0,728 | 0,999 | 0,288 | 0,542 | -0,341 | 0,992 | 0,297 | 0,480 | -0,397 |
| <i>PK_C16_D1</i>         | 0,624 | 0,558 | 0,477 | 0,280  | 0,615 | 0,551 | 0,482 | 0,280  | 0,624 | 0,552 | 0,505 | 0,294  | 0,633 | 0,563 | 0,503 | 0,299  |
| <i>PK_C16_D2</i>         | 0,947 | 0,349 | 0,493 | -0,208 | 0,953 | 0,387 | 0,402 | -0,286 | 0,951 | 0,331 | 0,441 | -0,315 | 0,944 | 0,343 | 0,440 | -0,284 |
| <i>PK_C16_D3</i>         | 0,997 | 0,329 | 0,423 | -0,436 | 0,994 | 0,310 | 0,235 | -0,781 | 1,000 | 0,277 | 0,514 | -0,402 | 0,994 | 0,289 | 0,491 | -0,401 |
| <i>PK_C2.8284271_D1</i>  | 0,623 | 0,564 | 0,485 | 0,288  | 0,615 | 0,554 | 0,487 | 0,285  | 0,624 | 0,548 | 0,502 | 0,291  | 0,634 | 0,562 | 0,504 | 0,299  |
| <i>PK_C2.8284271_D2</i>  | 0,890 | 0,491 | 0,475 | 0,050  | 0,892 | 0,445 | 0,398 | -0,109 | 0,890 | 0,460 | 0,466 | 0,002  | 0,874 | 0,410 | 0,578 | 0,082  |
| <i>PK_C2.8284271_D3</i>  | 0,986 | 0,373 | 0,474 | -0,265 | 0,982 | 0,408 | 0,251 | -0,564 | 0,991 | 0,337 | 0,560 | -0,217 | 0,984 | 0,341 | 0,347 | -0,508 |
| <i>PK_C2_D1</i>          | 0,623 | 0,567 | 0,489 | 0,292  | 0,614 | 0,555 | 0,495 | 0,290  | 0,625 | 0,547 | 0,500 | 0,289  | 0,633 | 0,562 | 0,508 | 0,301  |

|                         |       |       |       |        |       |       |       |        |       |       |       |        |       |       |       |        |
|-------------------------|-------|-------|-------|--------|-------|-------|-------|--------|-------|-------|-------|--------|-------|-------|-------|--------|
| <i>PK_C2_D2</i>         | 0,877 | 0,513 | 0,455 | 0,067  | 0,876 | 0,466 | 0,397 | -0,062 | 0,875 | 0,474 | 0,518 | 0,100  | 0,859 | 0,414 | 0,576 | 0,102  |
| <i>PK_C2_D3</i>         | 0,983 | 0,382 | 0,495 | -0,216 | 0,979 | 0,418 | 0,257 | -0,531 | 0,988 | 0,355 | 0,592 | -0,141 | 0,979 | 0,358 | 0,318 | -0,517 |
| <i>PK_C4_D1</i>         | 0,624 | 0,563 | 0,483 | 0,286  | 0,616 | 0,553 | 0,486 | 0,284  | 0,624 | 0,551 | 0,507 | 0,295  | 0,634 | 0,561 | 0,503 | 0,298  |
| <i>PK_C4_D2</i>         | 0,902 | 0,468 | 0,499 | 0,037  | 0,907 | 0,432 | 0,410 | -0,134 | 0,903 | 0,438 | 0,424 | -0,100 | 0,890 | 0,396 | 0,569 | 0,035  |
| <i>PK_C4_D3</i>         | 0,988 | 0,361 | 0,461 | -0,306 | 0,984 | 0,400 | 0,247 | -0,589 | 0,994 | 0,326 | 0,555 | -0,247 | 0,986 | 0,328 | 0,396 | -0,456 |
| <i>PK_C5.6568542_D1</i> | 0,624 | 0,562 | 0,483 | 0,285  | 0,615 | 0,554 | 0,484 | 0,283  | 0,623 | 0,549 | 0,505 | 0,293  | 0,633 | 0,562 | 0,502 | 0,298  |
| <i>PK_C5.6568542_D2</i> | 0,914 | 0,444 | 0,518 | 0,013  | 0,922 | 0,421 | 0,423 | -0,155 | 0,917 | 0,425 | 0,435 | -0,125 | 0,905 | 0,383 | 0,547 | -0,027 |
| <i>PK_C5.6568542_D3</i> | 0,990 | 0,353 | 0,426 | -0,376 | 0,986 | 0,386 | 0,249 | -0,610 | 0,996 | 0,314 | 0,560 | -0,265 | 0,988 | 0,316 | 0,436 | -0,421 |
| <i>PK_C8_D1</i>         | 0,624 | 0,560 | 0,481 | 0,283  | 0,614 | 0,553 | 0,481 | 0,280  | 0,623 | 0,549 | 0,505 | 0,293  | 0,634 | 0,562 | 0,504 | 0,299  |
| <i>PK_C8_D2</i>         | 0,925 | 0,417 | 0,513 | -0,046 | 0,933 | 0,403 | 0,417 | -0,206 | 0,928 | 0,405 | 0,453 | -0,145 | 0,919 | 0,375 | 0,524 | -0,084 |
| <i>PK_C8_D3</i>         | 0,992 | 0,344 | 0,414 | -0,414 | 0,988 | 0,363 | 0,245 | -0,660 | 0,997 | 0,303 | 0,551 | -0,300 | 0,990 | 0,305 | 0,464 | -0,403 |

**Table SI-6.** Summary of the performance of the individual and the ensemble models for protein-peptide models.

The models M1, M2, M3 and M4 correspond to the best predictors obtained from the training subsets 1, 2, 3 and 4 respectively. Then, the correlation coefficients (R) of the estimations in the development set were estimated for each model (R\_IND), as well as for each possible combination of models. The combination rules were average (V\_AVG), maximum (V\_MAX), and minimum, (V\_MIN) probabilities. The optimal ensemble model corresponds, from the group of ensembles two, to the model that outputs the binding affinity based on the maximum predicted value between the models obtained from the training subsets 1 and 3.

| <i>Ensembles</i> | <i>Model</i> | <i>R_IND</i> | <i>V_AVG</i> | <i>V_MAX</i> | <i>V_MIN</i> |
|------------------|--------------|--------------|--------------|--------------|--------------|
| 1                | M1           | 0,527        | 0,537        | 0,552        | 0,519        |
|                  | M2           | 0,539        |              |              |              |
| 2                | M1           | 0,527        | 0,540        | <b>0,556</b> | 0,519        |
|                  | M3           | 0,543        |              |              |              |
| 3                | M1           | 0,527        | 0,536        | 0,532        | 0,533        |
|                  | M4           | 0,532        |              |              |              |
| 4                | M2           | 0,539        | 0,545        | 0,548        | 0,539        |
|                  | M3           | 0,543        |              |              |              |
| 5                | M2           | 0,539        | 0,542        | 0,532        | 0,546        |
|                  | M4           | 0,532        |              |              |              |
| 6                | M3           | 0,543        | 0,544        | 0,543        | 0,540        |
|                  | M4           |              |              |              |              |
| 7                | M1           | 0,527        | 0,542        | 0,559        | 0,520        |
|                  | M2           | 0,539        |              |              |              |
|                  | M3           | 0,543        |              |              |              |
| 8                | M1           | 0,527        | 0,540        | 0,538        | 0,530        |
|                  | M2           | 0,539        |              |              |              |
|                  | M4           | 0,532        |              |              |              |
| 9                | M1           | 0,527        | 0,542        | 0,548        | 0,530        |
|                  | M3           | 0,543        |              |              |              |
|                  | M4           | 0,532        |              |              |              |
| 10               | M2           | 0,539        | 0,545        | 0,546        | 0,547        |
|                  | M3           | 0,543        |              |              |              |
|                  | M4           | 0,532        |              |              |              |
| 11               | M1           | 0,527        | 0,543        | 0,553        | 0,529        |
|                  | M2           | 0,539        |              |              |              |
|                  | M3           | 0,543        |              |              |              |
|                  | M4           | 0,532        |              |              |              |

**Figure SI-5.** Plots of experimental vs. predicted BA values of PPI-Affinity on the test sets of protein – protein affinity data.

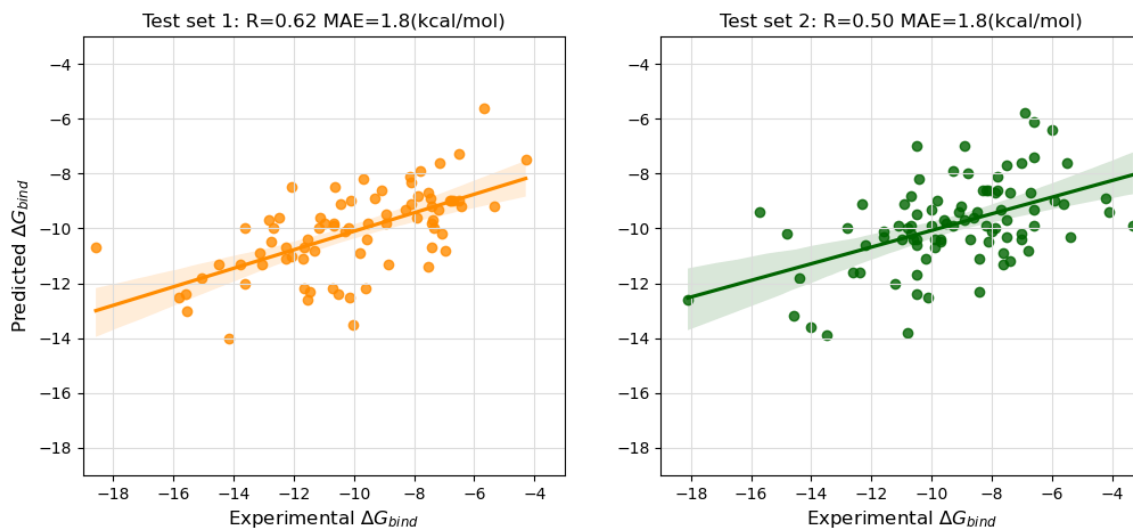

The performance is reported as the Pearson's Correlation coefficient (R) and the Mean Absolute Error (MAE) between experimental and predicted BA. Test set 1 corresponds to the benchmark of 79 complexes taken from Vangone and Bonvin.<sup>1</sup> Test set 2 corresponds to the hold-out set of 90 data points extracted from PDBbind (v.2020).<sup>8</sup>

### Section SI-5. Performance of PPI-Affinity vs. a state-of-the-art binding affinity classifier.

Recently, Abbasi, W. A. et al.<sup>32</sup> developed a method using *Learning Using Privileged Information* (LUPI) paradigm and Support Vector Machines, that classifies as “high” or “low” the binding affinity of protein-protein complexes. The predictor, called LUPIA,<sup>32</sup> was trained using sequence and structure information. Nevertheless, in production, only the sequence information of protein pairs is required. To build the model, the authors discretized the BA values into two classes. For this, they used as threshold -10.86, which is the median value of the BA of the training dataset.

Here we used this value to discretize the output of PPI-Affinity and compare our protein-protein model with LUPIA.<sup>32</sup> The assessment was performed in two test sets (Table SI-5.1). Test set 1 corresponds to the hold-out set of 90 data points taken from PDBbind (v.2020).<sup>8</sup> We removed four cases that are in common with the training set of LUPIA,<sup>32</sup> and the evaluation was performed on the remaining 86 data points. The test set has protein-protein complexes with BA values between -18.1 and -3.3 kcal/mol. After discretizing such values, 15 and 71 data points were classified as “high” and “low” BA, respectively.

The Test set 2 corresponds to 26 wild-type and 151 mutants of protein-protein complexes taken from the SKEMPI v2.0<sup>28</sup> database. This data was employed to assess the performance of PPI-Affinity (R = 0.78 and MAE = 1.4 kcal/mol). When only considering the wild-types, the performance of the model was R = 0.77 and MAE = 1.1 kcal/mol.

Here, we employed the 26 wild-type complexes to compare our method to the LUPIA<sup>32</sup> classifier. The experimental binding affinity values of the protein pairs ranged between -16.3 and -7.0 kcal/mol. We used as reference the threshold value -10.86 and divided the data into 14 cases classified as “high” and 12 classified as complexes with “low” binding affinity.

The benchmark of 79 protein-protein complexes employed by Vangone and Bonvin<sup>1</sup> was not used in this comparison, as most of the cases were found in to be common with the training set of the LUPIA<sup>32</sup> predictor.

The performance measures used to evaluate the models were Sensitivity (Sn) and Specificity (Sp), formulated as:

$$Sn = TP / (TP + FN)$$

$$Sp = TN / (TN + FP)$$

where:

TP: number of protein-protein complexes correctly predicted as presenting “high” BA,  
TN: number of protein-protein complexes correctly predicted as presenting “low” BA,  
FP: number of protein-protein complexes incorrectly predicted as presenting “high” BA,  
FN: number of protein-protein complexes incorrectly predicted as presenting “low” BA,



**Table SI-5.1.** Summary of the evaluation of PPI-Affinity and the LUPIA<sup>32</sup> classifier on two sets of protein – protein affinity data.

|    | Test set 1          |              | Test set 2          |              |
|----|---------------------|--------------|---------------------|--------------|
|    | LUPIA <sup>32</sup> | PPI-Affinity | LUPIA <sup>32</sup> | PPI-Affinity |
| Sn | <b>0.87</b>         | 0.47         | <b>1.0</b>          | 0.86         |
| Sp | 0.32                | <b>0.86</b>  | 0.17                | <b>0.67</b>  |

The performance measures are Sensitivity (Sn) and Specificity (Sp). Test set 1 corresponds to a test set of 86 data points taken from PDBbind (v.2020),<sup>8</sup> while Test set 2 corresponds to 26 wild-type structures taken from the SKEMPI 2.0 dataset.<sup>28</sup>

The sensitivity of PPI-Affinity in Test set 1 decreased (Sn = 0.47). Nevertheless, of the 15 cases labeled as “High” in this data set, the eight misclassified differ by less than 1.7 kcal/mol from the threshold used, which is within the margin of error of the PPI-Affinity model (MAE = 1.8 kcal/mol). From them, six BA values differ by less than 1 kcal/mol. This reflects the downside of using a threshold to classify BA values. Furthermore, in both test sets, it can be seen that LUPIA<sup>32</sup> suffered from been too optimistic, as the method ranked most of the cases as with “High” affinity.

**Figure SI-6.** Plot of experimental vs. predicted by PPI-Affinity BA values on the test set of protein – peptide affinity data.

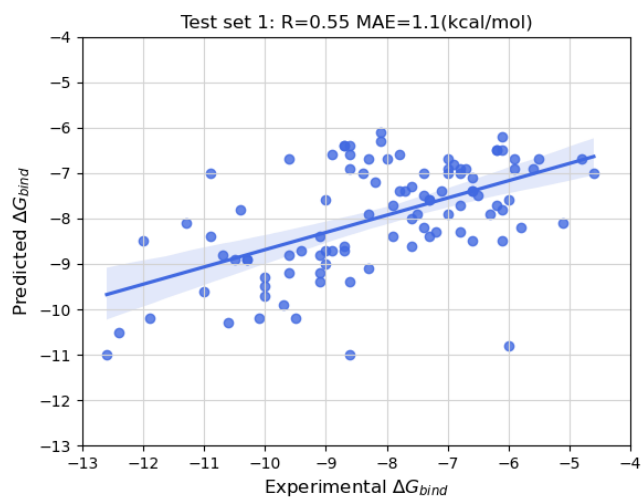

The performance is reported as the Pearson's Correlation coefficient (R) and the Mean Absolute Error (MAE) between experimental and predicted BA. The test set 1 corresponds to the hold-out set of 100 data points extracted from Biolip.<sup>37</sup>

**Section SI-6.** Description of the assays used to determine the binding affinities of EPI-X4 derivatives against the CRCX4 receptor.

To determine the affinity of the peptides for CXCR4, an antibody competition assay was used. The assay is based on the competitive binding of a fluorescently labelled anti-CXCR4 antibody (clone 12G5) with CXCR4 ligands.<sup>42</sup> For this 50,000 SupT1 cells/well were seeded in 96-well V-bottom microtiter plates in PBS supplemented with 1% FCS. The buffer was removed by centrifugation and cells precooled at 4°C for 15 min. The compound was serially diluted in PBS and added to the cells together with a 12G5 antibody at a constant concentration. Cells were incubated at 4°C for 2 hours before the unbound antibody and compounds were removed by 2 washing steps followed by fixation in 2% PFA. Mean fluorescence (MFI) of cells was determined by flow cytometry using FACS CytoFLEX. The isotype control was subtracted and values normalized to the 12G5-APC stained PBS control. IC<sub>50</sub> values were determined by non-linear regression using GraphPad Prism.

**Table SI-6.1** Summary of the binding affinities of EPI-X4 derivatives against CRCX4.

| Derivative | Sequence         | IC <sub>50</sub> (nM) |
|------------|------------------|-----------------------|
| JM#21      | ILRWSRKLPCVS     | 77                    |
| JM#122     | ILRWSRKLPSVS     | 130                   |
| JM#151     | IVRWSKKVPSVS     | 131                   |
| JM#23      | ILRWSRKVPSVS     | 173                   |
| JM#19      | ILRWSRKMPDFS     | 262                   |
| WSC02      | IVRWSKKVPCVS     | 268                   |
| JM#13      | ILRWSRKMPCVS     | 271                   |
| JM#20      | ILRWSRKMPCMS     | 272,5                 |
| JM#10      | IFRWSRKVPCVS     | 315                   |
| JM#18      | ILRWSRKMPCLS     | 385                   |
| 408-414    | LVRVYTKK         | 482                   |
| JM#4       | IVRWSHKVPCVS     | 535                   |
| 408-415    | LVRVYTKKV        | 562                   |
| JM#146     | IYRWSRKMPCLS     | 584                   |
| JM#9       | ILRWSHKVPCVS     | 615                   |
| JM#1       | ILRWSKKVPCVS     | 732                   |
| 408-421    | LVRVYTKKVPQVSTP  | 825                   |
| JM#105     | IIRWSKKVPCVS     | 966                   |
| JM#113     | IIRWSRKLPCVS     | 1099                  |
| 408-420    | LVRVYTKKVPQVST   | 1102                  |
| 408-417    | LVRVYTKKVPQ      | 1103                  |
| 408-418    | LVRVYTKKVPQV     | 1364                  |
| 408-422    | LVRVYTKKVPQVSTPT | 1407                  |
| JM#133     | IVRWSKYVS        | 1584                  |

|               |                         |             |
|---------------|-------------------------|-------------|
| JM#111        | FLRWSRKLPCVS            | 3353        |
| JM#112        | PLRWSRKLPCVS            | 3371        |
| <b>EPI-X4</b> | <b>LVRVTKKVPQVSTPTL</b> | <b>3709</b> |
| JM#94         | LIRVTKKVPQVSTPTL        | 6623        |
| JM#103        | FVRWSKKVPCVS            | 8748        |
| 408-413       | LVRVTK                  | 9295        |
| JM#123        | ILKSSKLPCLS             | >10000      |
| JM#125        | ILRHSRGPS               | >10000      |
| JM#126        | IPKWSRGVS               | >10000      |
| JM#127        | ILKQSRKAPL              | >10000      |
| JM#128        | ILRTSRFISS              | >10000      |
| JM#129        | IVRSRKGTVS              | >10000      |
| JM#130        | IVRWSPPCVS              | >10000      |
| JM#131        | IVKSKKAPCVS             | >10000      |
| JM#132        | IVRKKVPCPS              | >10000      |
| JM#134        | IVKSHKAPCVS             | >10000      |
| JM#135        | IVRSSRKVVS              | >10000      |
| JM#136        | IARSKRGPCAN             | >10000      |
| JM#137        | IVKNQRKVPV              | >10000      |
| JM#138        | VVRNSKAAFH              | >10000      |
| JM#152        | CLKLPGGSCM              | >10000      |
| JM#153        | CLRLPGGSC               | >10000      |
| JM#154        | NIRVGGTGMF              | >10000      |
| JM#155        | QKV VAGVANAL            | >10000      |
| JM#156        | SRVLNLGPI               | >10000      |
| JM#157        | MRRAPAFLSA              | >10000      |
| JM#158        | AGRKGLIAV               | >10000      |
| JM#159        | NEKRFYLK                | >10000      |
| JM#160        | SRDKALLRL               | >10000      |
| JM#161        | GKHVPRAV FV             | >10000      |
| JM#162        | SKSGRLLLAGY             | >10000      |
| JM#92         | FVRVTKKVPQVSTPTL        | >10000      |
| JM#93         | PVRVTKKVPQVSTPTL        | >10000      |

---

**Section SI-7.** Description of the models used for the generation of the data related to peptide binders to the PDZ domain of HTRA1 or HTRA3 (Tables 3 and 4).

The template used for the predictions of the binding affinity of peptides with HTRA1 was based on the high-resolution structure corresponding to the PDB code 2JOA.<sup>43</sup> The first model of the ensemble was used for the predictions. In the case of the HTRA3 protein-peptide complexes, the structure with the PDB code 2PW3 was employed as template.<sup>43</sup> Chain A from the protein dimeric structure was used since it lacks only two residues in contrast to chain B which lacks 8 residues. Conformer A of Ser 446 was used in our model. Residues missing in the model were given to the server by using the sequence option.

**Table SI-7.1.** Ranking of BA of HTRA1-peptide complexes as predicted by state-of-the-art models.

| Kdeep                    |              | DFIRE                    |              | CP_PIE                   |                | RF-Score                  |             | Prodigy                   |             |
|--------------------------|--------------|--------------------------|--------------|--------------------------|----------------|---------------------------|-------------|---------------------------|-------------|
| Ranking                  | BA           | Ranking                  | BA           | Ranking                  | BA             | Ranking                   | BA          | Ranking                   | BA          |
| 1) WDKIWHV               | -13,5        | 1) ASRIWWV               | -16,6        | 1) DSAIWWV               | 1,25491        | 1) DSRWWV                 | 7,11        | 1) GWKTWIL                | -8,1        |
| 2) ASRIWWV               | -13,4        | 2) DIETWLL               | -16,5        | 2) DIETWLL               | 1,22589        | <b>2) DSRIWWV</b>         | <b>7,03</b> | 2) DIETWLL                | -7,4        |
| 3) DIETWLL               | -12,6        | 3) DARIWWV               | -16,2        | 3) DARIWWV               | 1,16295        | 3) DARIWWV                | 7,01        | 3) WDKIWHV                | -7,2        |
| 4) DARIWWV               | -12,5        | 3) DSAIWWV               | -16,2        | 4) ASRIWWV               | 1,11223        | 4) WDKIWHV                | 7           | 4) ASRIWWV                | -6,9        |
| 4) DSRWWV                | -12,5        | <b>4) DSRIWWV</b>        | <b>-16,1</b> | 5) DSRIWWA               | 1,06328        | 5) ASRIWWV                | 6,96        | 5) DARIWWV                | -6,7        |
| 4) GWKTWIL               | -12,5        | 4) GWKTWIL               | -16,1        | <b>6) DSRIWWV</b>        | <b>1,05627</b> | 6) DSRIWAV                | 6,95        | 5) DSAIWWV                | -6,7        |
| 5) DSRIWWA               | -12,0        | 5) DSRWWV                | -15,7        | 7) DSRIWV                | 1,04117        | 7) DSAIWWV                | 6,91        | 6) DSRWWV                 | -6,5        |
| 6) DSAIWWV               | -11,9        | 6) WDKIWHV               | -15,6        | 8) DIGPVCFL <sup>a</sup> | 1,00710        | 7) GWKTWIL                | 6,91        | 7) DSRIWWA                | -6,2        |
| <b>7) DSRIWWV</b>        | <b>-11,7</b> | 7) DIGPVCFL <sup>a</sup> | -15,3        | 9) DSRWWV                | 1,00222        | 8) DIETWLL                | 6,9         | <b>7) DSRIWWV</b>         | <b>-6,2</b> |
| 8) DSRIWV                | -11,1        | 8) DSRIWWA               | -14,9        | 10) WDKIWHV              | 0,91622        | 8) DSRIWWA                | 6,9         | 8) DSRIWV                 | -6,1        |
| 9) DIGPVCFL <sup>a</sup> | -11,0        | 9) EVKIMVV <sup>a</sup>  | -14,1        | 11) GWKTWIL              | 0,88501        | 9) DSRIWV                 | 6,79        | 8) DSRIWV                 | -6,1        |
| 10) EVKIMVV <sup>a</sup> | -10,7        | 10) DSRIWV               | -14,0        | 12) DSRIWV               | 0,83207        | 10) DIGPVCFL <sup>a</sup> | 6,64        | 9) EVKIMVV <sup>a</sup>   | -5,8        |
| 11) DSRIWV               | -10,1        | 11) DSRIWV               | -13,4        | 13) EVKIMVV <sup>a</sup> | 0,82242        | 11) EVKIMVV <sup>a</sup>  | 6,47        | 10) DIGPVCFL <sup>a</sup> | -5,6        |

<sup>a</sup>These protein-peptide structures are at the border of the applicability domain of PPI-Affinity

**Table SI-7.2.** Ranking of BA of HTRA3-peptide complexes as predicted by state-of-the-art models.

| Kdeep                       |             | DFIRE                       |             | CP_PIE                      |                 | RF-Score                    |             | Prodigy                     |             |
|-----------------------------|-------------|-----------------------------|-------------|-----------------------------|-----------------|-----------------------------|-------------|-----------------------------|-------------|
| Ranking                     | BA          | Ranking                     | BA          | Ranking                     | BA              | Ranking                     | BA          | Ranking                     | BA          |
| 1) FGRWF <sup>b</sup>       | -10,0       | 1) FGRWA <sup>a</sup>       | -6,6        | 1) FGRWA <sup>a</sup>       | 0,357316        | 1) FARWV <sup>b</sup>       | 4,24        | 1) RSWWV                    | -4,9        |
| <b>2) FGRWV<sup>a</sup></b> | <b>-8,9</b> | 2) FARWV <sup>b</sup>       | -6,4        | <b>2) FGRWV<sup>a</sup></b> | <b>0,356035</b> | <b>2) FGRWV<sup>a</sup></b> | <b>4,08</b> | 2) RWV <sup>a</sup>         | -3,7        |
| 3) FGRWI <sup>b</sup>       | -8,8        | 2) FGRWL <sup>a</sup>       | -6,4        | 3) FGRWF <sup>b</sup>       | 0,35465         | 3) FGRWI <sup>b</sup>       | 3,97        | 3) WG <sup>b</sup>          | -3,6        |
| 4) RSWWV                    | -8,6        | 3) FGAWV <sup>b</sup>       | -6,2        | 4) FGRWL <sup>a</sup>       | 0,352168        | 4) FGRWA <sup>a</sup>       | 3,9         | 4) FARWV <sup>b</sup>       | -3,5        |
| 5) FARWV <sup>b</sup>       | -8,5        | 3) FGRWI <sup>b</sup>       | -6,2        | 5) FGAWV <sup>b</sup>       | 0,348097        | 5) FGRWL <sup>a</sup>       | 3,88        | 4) WA <sup>b</sup>          | -3,5        |
| 6) FGRWL <sup>a</sup>       | -8,2        | 4) FGRWF <sup>b</sup>       | -6,1        | 6) FGRWI <sup>b</sup>       | 0,345033        | 6) FGRWF <sup>b</sup>       | 3,84        | 5) FGRWA <sup>a</sup>       | -3,3        |
| 7) FGRWA <sup>a</sup>       | -7,9        | <b>5) FGRWV<sup>a</sup></b> | <b>-6,0</b> | 7) FARWV <sup>b</sup>       | 0,333353        | 7) FGAWV <sup>b</sup>       | 3,81        | 5) FGRWF <sup>b</sup>       | -3,3        |
| 8) FGAWV <sup>b</sup>       | -7,8        | 6) RSWWV                    | -5,3        | 8) FGRAV <sup>a</sup>       | 0,248552        | 7) RSWWV                    | 3,81        | <b>5) FGRWV<sup>a</sup></b> | <b>-3,3</b> |
| 9) FGRAV <sup>a</sup>       | -7,0        | 7) FGRAV <sup>a</sup>       | -4,1        | 9) WG <sup>b</sup>          | 0,163576        | 8) FGRAV <sup>a</sup>       | 3,66        | 5) GRWV <sup>a</sup>        | -3,3        |

|                       |      |                       |      |                       |          |                       |      |                       |      |
|-----------------------|------|-----------------------|------|-----------------------|----------|-----------------------|------|-----------------------|------|
| 10) GRWV <sup>a</sup> | -6,8 | 8) RWV <sup>a</sup>   | -3,9 | 10) RSWWV             | 0,159256 | 9) WG <sup>b</sup>    | 3,47 | 5) WV <sup>b</sup>    | -3,3 |
| 11) RWV <sup>a</sup>  | -5,7 | 9) WV <sup>b</sup>    | -3,7 | 11) WA <sup>b</sup>   | 0,150201 | 10) WV <sup>b</sup>   | 3,45 | 6) FGAWV <sup>b</sup> | -3,2 |
| 12) WA <sup>b</sup>   | -5,3 | 10) WA <sup>b</sup>   | -3,5 | 12) RWV <sup>a</sup>  | 0,14853  | 11) GRWV <sup>a</sup> | 3,44 | 6) FGRWI <sup>b</sup> | -3,2 |
| 13) WV <sup>b</sup>   | -5,1 | 11) WG <sup>b</sup>   | -3,3 | 13) GRWV <sup>a</sup> | 0,101262 | 12) RWV <sup>a</sup>  | 3,42 | 6) FGRWL <sup>a</sup> | -3,2 |
| 14) WG <sup>b</sup>   | -4,2 | 12) GRWV <sup>a</sup> | -2,9 | 14) WV <sup>b</sup>   | 0,0838   | 13) WA <sup>b</sup>   | 3,4  | 7) FGRAV <sup>a</sup> | -3   |

<sup>a</sup>These protein-peptide structures are at the border of the applicability domain of PPI-Affinity. <sup>b</sup>These protein-peptide structures are outside the applicability domain of PPI-Affinity

**Table SI-7.** Summary of values that define the applicability domain of the protein-protein model.

| <b>MODEL 2</b>      |                |                |                                  |                                   |
|---------------------|----------------|----------------|----------------------------------|-----------------------------------|
| <b>DESCRIPTOR</b>   | <b>MINIMUM</b> | <b>MAXIMUM</b> | <b>1<sup>st</sup> PERCENTILE</b> | <b>99<sup>TH</sup> PERCENTILE</b> |
| WNC(ECI)_NO_AHR_G   | 0              | 1              | 0,13                             | 1                                 |
| WNC(ECI)_NO_ALR_G   | 0              | 1              | 0,05                             | 1                                 |
| WNC(Z2)_NO_PLR_V    | 0              | 46,59          | 0                                | 27,418                            |
| WNC(Z2)_NO_PCR_G    | -3,128         | 2,512          | -2,237                           | 1,857                             |
| WNC(Z3)_NO_GLU_V    | 0              | 6,545          | 0                                | 5,892                             |
| WNC(Z3)_NO_PLR_P2   | 0              | 5,317          | 0                                | 5,195                             |
| WNC(Z3)_NO_PRT_P2   | 0              | 4,133          | 0                                | 3,833                             |
| WFLC(ECI)_NO_ILE_P2 | 0              | 0,014          | 0                                | 0,006                             |
| WFLC(IP)_NO_PCR_AR  | 0              | 0,035          | 0                                | 0,027                             |
| WFLC(IP)_NO_PCR_V   | 0              | 0,002          | 0                                | 0,001                             |
| WFLC(ISA)_NO_PLR_AR | 0              | 0,011          | 0                                | 0,008                             |
| WNLC(ECI)_NO_AHR_V  | 0              | 2,31           | 0,005                            | 2,15                              |
| WNLC(ECI)_NO_NPR_N1 | 0              | 81,424         | 0,407                            | 67,557                            |
| WNLC(ECI)_NO_NPR_DE | 0              | 0,599          | 0,016                            | 0,568                             |
| WNLC(IP)_NO_BSR_N1  | 0              | 28896,816      | 304,609                          | 25512,865                         |
| WNLC(IP)_NO_PLR_N1  | 0              | 56383,04       | 695,219                          | 51326,103                         |
| WNLC(ISA)_NO_BSR_N2 | 0              | 607045,942     | 46153,136                        | 568135,465                        |
| WNLC(ISA)_NO_PLR_G  | 1              | 10458,877      | 1,671                            | 9535,444                          |
| WNLC(Z1)_NO_AHR_DE  | 0              | 12,626         | 1,257                            | 12,044                            |
| WNLC(Z1)_NO_ALR_N2  | 0              | 269,091        | 17,584                           | 212,189                           |
| WNLC(Z1)_NO_NCR_P2  | 0              | 15,07          | 1,402                            | 12,439                            |
| WNLC(Z1)_NO_PRT_AR  | -2,423         | 3,379          | -2,075                           | 2,05                              |
| WNLC(Z2)_NO_BSR_G   | -4,237         | 4,778          | -4,157                           | 4,315                             |
| WNLC(Z2)_NO_ALR_N1  | -112,241       | 2145,601       | -51,79                           | 1292,54                           |
| WNLC(Z3)_NO_AHR_AR  | -0,777         | 3,884          | -0,666                           | 2,621                             |
| WNLC(Z3)_NO_ALR_AR  | -0,581         | 1,985          | -0,318                           | 1,324                             |



**MODEL 3**

| <b>DESCRIPTOR</b>   | <b>MINIMUM</b> | <b>MAXIMUM</b> | <b>1<sup>st</sup> PERCENTILE</b> | <b>99<sup>TH</sup> PERCENTILE</b> |
|---------------------|----------------|----------------|----------------------------------|-----------------------------------|
| WNC(ECI)_NO_AHR_G   | 0              | 1              | 0,175                            | 1                                 |
| WNC(ECI)_NO_ALR_G   | 0              | 1              | 0,05                             | 1                                 |
| WNC(Z2)_NO_PLR_V    | 0              | 46,59          | 0                                | 27,418                            |
| WNC(Z2)_NO_PCR_G    | -2,014         | 2,512          | -1,888                           | 1,615                             |
| WNC(Z3)_NO_GLU_V    | 0              | 6,457          | 0                                | 5,216                             |
| WNC(Z3)_NO_PLR_P2   | 0              | 5,413          | 0                                | 5,28                              |
| WNC(Z3)_NO_PRT_P2   | 0              | 4,133          | 0                                | 3,904                             |
| WFLC(ECI)_NO_ILE_P2 | 0              | 0,014          | 0                                | 0,007                             |
| WFLC(IP)_NO_PCR_AR  | 0              | 0,035          | 0,001                            | 0,02                              |
| WFLC(IP)_NO_PCR_V   | 0              | 0,002          | 0                                | 0,001                             |
| WFLC(ISA)_NO_PLR_AR | 0              | 0,009          | 0                                | 0,008                             |
| WNLC(ECI)_NO_AHR_V  | 0              | 2,31           | 0,142                            | 2,177                             |
| WNLC(ECI)_NO_NPR_N1 | 0              | 75,842         | 3,807                            | 66,742                            |
| WNLC(ECI)_NO_NPR_DE | 0              | 0,599          | 0,064                            | 0,582                             |
| WNLC(IP)_NO_BSR_N1  | 0              | 25889,035      | 458,054                          | 22440,66                          |
| WNLC(IP)_NO_PLR_N1  | 0              | 52027,76       | 790,424                          | 47683,177                         |
| WNLC(ISA)_NO_BSR_N2 | 0              | 569128,79      | 77888,907                        | 497878,815                        |
| WNLC(ISA)_NO_PLR_G  | 1              | 10502,058      | 4,237                            | 9636,287                          |
| WNLC(Z1)_NO_AHR_DE  | 0              | 12,628         | 3,082                            | 12,373                            |
| WNLC(Z1)_NO_ALR_N2  | 0              | 269,091        | 27,865                           | 186,411                           |
| WNLC(Z1)_NO_NCR_P2  | 0              | 12,857         | 3,593                            | 11,926                            |
| WNLC(Z1)_NO_PRT_AR  | -4,954         | 2,927          | -2,312                           | 2,048                             |
| WNLC(Z2)_NO_BSR_G   | -4,237         | 4,778          | -4,157                           | 4,315                             |
| WNLC(Z2)_NO_ALR_N1  | -112,241       | 2145,601       | -51,79                           | 1292,54                           |
| WNLC(Z3)_NO_AHR_AR  | -1,035         | 2,876          | -0,706                           | 2,59                              |
| WNLC(Z3)_NO_ALR_AR  | -0,581         | 1,65           | -0,385                           | 1,288                             |

**Table SI-8.** Summary of values that define the applicability domain of the protein-peptide model.

**MODEL 1**

| <b>DESCRIPTOR</b>     | <b>MINIMUM</b> | <b>MAXIMUM</b> | <b>1<sup>st</sup> PERCENTILE</b> | <b>99<sup>TH</sup> PERCENTILE</b> |
|-----------------------|----------------|----------------|----------------------------------|-----------------------------------|
| WNC(ECI)_NO_AHR_N1    | 0              | 44,171         | 0,086                            | 28,189                            |
| WNC(ECI)_NO_ALR_N1    | 0              | 6,367          | 0,037                            | 4,032                             |
| WNC(IP)_NO_PLR_N1     | 0              | 5391,296       | 96,607                           | 3672,786                          |
| WNC(ISA)_NO_PLR_V     | 0              | 318853829,8    | 543962,387                       | 250318617,3                       |
| WNC(Z1)_NO_NPR_N2     | 0              | 132,965        | 4,695                            | 111,105                           |
| WNC(Z1)_NO_ARM_V      | 0              | 692,98         | 0                                | 323,717                           |
| WNC(Z1)_NO_PRT_N1     | -241,412       | 418,803        | -169,452                         | 331,683                           |
| WNC(Z3)_NO_AHR_N1     | -57,396        | 149,198        | -37,179                          | 58,761                            |
| WNC(Z3)_NO_UCR_N1     | -34,347        | 33,82          | -32,638                          | 25,764                            |
| WFLC(ECI)_NO_AHR_SI30 | 0,007          | 1              | 0,011                            | 0,764                             |
| WFLC(ECI)_NO_PCR_V    | 0              | 0,026          | 0                                | 0,015                             |
| WFLC(IP)_NO_RTR_MI30  | 0,062          | 4,74           | 0,074                            | 4,523                             |
| WFLC(IP)_NO_BSR_AR    | 0,001          | 0,037          | 0,001                            | 0,024                             |
| WFLC(IP)_NO_UCR_RA    | 0,001          | 0,5            | 0,001                            | 0,314                             |
| WFLC(IP)_NO_UCR_K     | 46,226         | 12840,122      | 70,881                           | 11654,217                         |
| WFLC(IP)_NO_PRT_TI30  | 14,202         | 573,443        | 18,237                           | 454,996                           |
| WFLC(ISA)_NO_NPR_P2   | 0,006          | 0,094          | 0,007                            | 0,082                             |
| WFLC(ISA)_NO_NPR_DE   | 0,005          | 0,089          | 0,007                            | 0,071                             |
| WFLC(ISA)_NO_PRT_TI30 | 14,202         | 582,373        | 18,237                           | 461,122                           |
| WFLC(Z1)_NO_BSR_SI30  | 0,009          | 1              | 0,02                             | 0,914                             |
| WFLC(Z2)_NO_PLR_K     | 113,123        | 49106,737      | 364,597                          | 40834,695                         |
| WNLC(ECI)_NO_BSR_I50  | 0,124          | 1,531          | 0,13                             | 1,323                             |
| WNLC(ECI)_NO_PLR_K    | 110,951        | 25195,103      | 240,618                          | 18518,305                         |
| WNLC(ECI)_NO_UCR_S    | -0,109         | 2,746          | 0,071                            | 2,166                             |
| WNLC(IP)_NO_RTR_V     | 339,368        | 1437,317       | 375,712                          | 1305,349                          |
| WNLC(IP)_NO_UCR_I50   | 11,749         | 62,265         | 18,864                           | 56,295                            |
| WNLC(ISA)_NO_UCR_S    | -0,009         | 4,109          | 0,53                             | 3,201                             |
| WNLC(Z1)_NO_RTR_SI30  | 0,547          | 1              | 0,562                            | 0,95                              |
| WNLC(Z1)_NO_BSR_K     | 80,492         | 12661,731      | 113,741                          | 10133,441                         |
| WNLC(Z1)_NO_UCR_K     | 38,097         | 8637,703       | 57,65                            | 7834,548                          |
| WNLC(Z2)_NO_AHR_P2    | 1,46           | 4,799          | 1,647                            | 4,391                             |
| WNLC(Z2)_NO_PCR_N2    | 4,845          | 56,314         | 6,671                            | 54,94                             |
| WNLC(Z2)_NO_NCR_P2    | 0,714          | 4,332          | 0,905                            | 3,913                             |
| WNLC(Z2)_NO_UCR_K     | 56,544         | 7155,916       | 69,33                            | 6747,321                          |
| WNLC(Z3)_NO_PLR_SI30  | 0,419          | 0,827          | 0,423                            | 0,775                             |
| WNLC(Z3)_NO_NCR_RA    | 4,361          | 27,671         | 5,534                            | 22,597                            |
| WNLC(Z3)_NO_UCR_TI30  | 20,529         | 504,745        | 29,219                           | 462,806                           |

**MODEL 3**

| <b>DESCRIPTOR</b>     | <b>MINIMUM</b> | <b>MAXIMUM</b> | <b>1<sup>ST</sup> PERCENTILE</b> | <b>99<sup>TH</sup> PERCENTILE</b> |
|-----------------------|----------------|----------------|----------------------------------|-----------------------------------|
| WNC(ECI)_NO_AHR_N1    | 0              | 44,171         | 0,056                            | 27,473                            |
| WNC(ECI)_NO_ALR_N1    | 0              | 6,367          | 0,023                            | 4,239                             |
| WNC(IP)_NO_PLR_N1     | 0              | 5554,6         | 66,773                           | 4292,97                           |
| WNC(ISA)_NO_PLR_V     | 0              | 290472538,7    | 543962,387                       | 236857692,4                       |
| WNC(Z1)_NO_NPR_N2     | 0              | 132,965        | 4,695                            | 115,217                           |
| WNC(Z1)_NO_ARM_V      | 0              | 692,98         | 0                                | 323,717                           |
| WNC(Z1)_NO_PRT_N1     | -241,412       | 418,803        | -167,234                         | 331,683                           |
| WNC(Z3)_NO_AHR_N1     | -63,649        | 149,198        | -40,292                          | 58,582                            |
| WNC(Z3)_NO_UCR_N1     | -35,227        | 33,82          | -32,638                          | 25,745                            |
| WFLC(ECI)_NO_AHR_SI30 | 0,01           | 1              | 0,013                            | 0,764                             |
| WFLC(ECI)_NO_PCR_V    | 0              | 0,026          | 0                                | 0,014                             |
| WFLC(IP)_NO_RTR_MI30  | 0,071          | 4,657          | 0,079                            | 4,501                             |
| WFLC(IP)_NO_BSR_AR    | 0,001          | 0,035          | 0,001                            | 0,024                             |
| WFLC(IP)_NO_UCR_RA    | 0,001          | 0,5            | 0,001                            | 0,322                             |
| WFLC(IP)_NO_UCR_K     | 23,224         | 20147,154      | 79,781                           | 11654,217                         |
| WFLC(IP)_NO_PRT_TI30  | 13,456         | 566,217        | 17,456                           | 453,162                           |
| WFLC(ISA)_NO_NPR_P2   | 0,006          | 0,094          | 0,007                            | 0,081                             |
| WFLC(ISA)_NO_NPR_DE   | 0,004          | 0,089          | 0,005                            | 0,071                             |
| WFLC(ISA)_NO_PRT_TI30 | 13,456         | 577,568        | 17,456                           | 456,221                           |
| WFLC(Z1)_NO_BSR_SI30  | 0,009          | 0,969          | 0,02                             | 0,906                             |
| WFLC(Z2)_NO_PLR_K     | 113,123        | 47098,384      | 407,834                          | 35890,325                         |
| WNLC(ECI)_NO_BSR_I50  | 0,118          | 1,396          | 0,129                            | 1,253                             |
| WNLC(ECI)_NO_PLR_K    | 110,951        | 22599,466      | 244,172                          | 18485,829                         |
| WNLC(ECI)_NO_UCR_S    | -0,109         | 2,746          | 0,106                            | 2,346                             |
| WNLC(IP)_NO_RTR_V     | 305,401        | 1463,52        | 375,712                          | 1200,763                          |
| WNLC(IP)_NO_UCR_I50   | 13,728         | 62,265         | 19,17                            | 57,883                            |
| WNLC(ISA)_NO_UCR_S    | 0,398          | 4,109          | 0,64                             | 2,989                             |
| WNLC(Z1)_NO_RTR_SI30  | 0,552          | 1              | 0,569                            | 0,932                             |
| WNLC(Z1)_NO_BSR_K     | 83,132         | 12260,904      | 113,637                          | 10124,995                         |
| WNLC(Z1)_NO_UCR_K     | 38,097         | 10241,145      | 63,865                           | 7305,526                          |
| WNLC(Z2)_NO_AHR_P2    | 1,575          | 4,856          | 1,723                            | 4,396                             |
| WNLC(Z2)_NO_PCR_N2    | 4,845          | 56,314         | 6,671                            | 54,92                             |
| WNLC(Z2)_NO_NCR_P2    | 0,714          | 4,332          | 0,905                            | 3,968                             |
| WNLC(Z2)_NO_UCR_K     | 58,983         | 7155,916       | 72,516                           | 6550,209                          |
| WNLC(Z3)_NO_PLR_SI30  | 0,419          | 0,833          | 0,423                            | 0,76                              |
| WNLC(Z3)_NO_NCR_RA    | 4,361          | 27,671         | 5,36                             | 22,538                            |
| WNLC(Z3)_NO_UCR_TI30  | 16             | 504,745        | 31,299                           | 462,593                           |

**Table SI-9.** Summary of the minimum and maximum values of the sequences' length of the peptides and proteins in each dataset.

|             | Data size | Protein size (aa) |     |          |     |
|-------------|-----------|-------------------|-----|----------|-----|
|             |           | Peptide           |     | Receptor |     |
|             |           | Min               | Max | Min      | Max |
| Training    | 922       | 3                 | 29  | 31       | 957 |
| Development | 100       | 4                 | 29  | 51       | 559 |
| Test        | 100       | 4                 | 29  | 51       | 496 |
| EPI-X4      | 57        | 6                 | 16  | 319      | 319 |
| HTRA1       | 13        | 7                 | 8   | 105      | 105 |
| HTRA3       | 14        | 2                 | 5   | 105      | 105 |

The described subsets are the training, development and test sets with data points taken from the Biolip<sup>37</sup> database, as well as those used to test the protein-peptide model on experimentally measured BA data: EPI-X4, HTRA1 and HTRA3.

**Table SI-10.** Descriptive statistics of the different data sets used in the modeling and test of the protein-protein BA predictor.

|                          | Data size | Binding Affinity ( $\Delta G$ ) |      |       |        |
|--------------------------|-----------|---------------------------------|------|-------|--------|
|                          |           | Min                             | Max  | Mean  | StdDev |
| Training set             | 648       | -18.1                           | -3.1 | -9.7  | 2.5    |
| Development set          | 90        | -18.1                           | -4.3 | -9.5  | 2.6    |
| Test set 1 <sup>1</sup>  | 79        | -18.6                           | -4.3 | -10.1 | 2.8    |
| Test set 2               | 90        | -18.1                           | -3.3 | -9.3  | 2.6    |
| Test set 3 <sup>28</sup> | 177       | -16.3                           | -5.5 | -10.4 | 2.6    |

The reported statistics are the minimum (Min), maximum (Max), mean and standard deviation (StdDev) of the binding free energy ( $\Delta G$ ) values in each dataset. The described subsets are: the training, development, and test (Test set 2) sets with data taken from the PDBbind (v.2020)<sup>8</sup> dataset, Test set 1 corresponding to the benchmark employed by Vangone and Bonvin,<sup>1</sup> and Test set 3 corresponding to the set of 26 wild-types and 151 mutants taken from the SKEMPI<sup>28</sup> dataset. All the training protein-protein complexes contained two protein sequences with individual sequence length ranging from 20 to 958 amino acids.

**Table SI-11.** Descriptive statistics of the training, development and test sets used in the modeling of the protein-peptide BA predictor.

|                 | Data size | Binding Affinity ( $\Delta G$ ) |      |      |        |
|-----------------|-----------|---------------------------------|------|------|--------|
|                 |           | Min                             | Max  | Mean | StdDev |
| Training set    | 922       | -14.4                           | -3.6 | -8.2 | 2.1    |
| Development set | 100       | -13.6                           | -4.8 | -8.5 | 2.0    |
| Test set        | 100       | -12.6                           | -4.6 | -8.1 | 1.7    |

The reported statistics are the minimum (Min), maximum (Max), mean and standard deviation (StdDev) of the binding free energy ( $\Delta G$ ) values in each dataset.

## References

1. Vangone, A.; Bonvin, A. M., Contacts-based prediction of binding affinity in protein-protein complexes. *Elife* **2015**, *4*, e07454-e07454.
2. Kastritis, P. L.; Moal, I. H.; Hwang, H.; Weng, Z.; Bates, P. A.; Bonvin, A. M. J. J.; Janin, J., A structure-based benchmark for protein-protein binding affinity. *Protein Science* **2011**, *20*, 482-491.
3. Liu, S.; Zhang, C.; Zhou, H.; Zhou, Y., A physical reference state unifies the structure-derived potential of mean force for protein folding and binding. *Proteins: Structure, Function, and Bioinformatics* **2004**, *56*, 93-101.
4. Ravikant, D. V. S.; Elber, R., PIE-efficient filters and coarse grained potentials for unbound protein-protein docking. *Proteins* **2010**, *78*, 400-419.
5. Berman, H. M.; Westbrook, J.; Feng, Z.; Gilliland, G.; Bhat, T. N.; Weissig, H.; Shindyalov, I. N.; Bourne, P. E., The Protein Data Bank. *Nucleic Acids Research* **2000**, *28*, 235-242.
6. RCSB PDB. <https://www.rcsb.org/>
7. Jiménez, J.; Škalič, M.; Martínez-Rosell, G.; De Fabritiis, G., KDEEP: Protein-Ligand Absolute Binding Affinity Prediction via 3D-Convolutional Neural Networks. *Journal of Chemical Information and Modeling* **2018**, *58*, 287-296.
8. Wang, R.; Fang, X.; Lu, Y.; Wang, S., The PDBbind Database: Collection of Binding Affinities for Protein-Ligand Complexes with Known Three-Dimensional Structures. *Journal of Medicinal Chemistry* **2004**, *47*, 2977-2980.
9. Ballester, P. J.; Mitchell, J. B. O., A machine learning approach to predicting protein-ligand binding affinity with applications to molecular docking. *Bioinformatics* **2010**, *26*, 1169-1175.
10. Rodriguez-Soca, Y.; Munteanu, C. R.; Dorado, J.; Pazos, A.; Prado-Prado, F. J.; González-Díaz, H., Trypano-PPI: A Web Server for Prediction of Unique Targets in Trypanosome Proteome by using Electrostatic Parameters of Protein-protein Interactions. *Journal of Proteome Research* **2010**, *9*, 1182-1190.
11. Dobson, P. D.; Doig, A. J., Distinguishing Enzyme Structures from Non-enzymes Without Alignments. *Journal of Molecular Biology* **2003**, *330*, 771-783.
12. Rodriguez-Soca, Y.; Munteanu, C. R.; Dorado, J.; Rabuñal, J.; Pazos, A.; González-Díaz, H., Plasmod-PPI: A web-server predicting complex biopolymer targets in plasmodium with entropy measures of protein-protein interactions. *Polymer* **2010**, *51*, 264-273.
13. Chou, K.-C.; Cai, Y.-D., Predicting Protein-Protein Interactions from Sequences in a Hybridization Space. *Journal of Proteome Research* **2006**, *5*, 316-322.
14. von Mering, C.; Jensen, L. J.; Snel, B.; Hooper, S. D.; Krupp, M.; Foglierini, M.; Jouffre, N.; Huynen, M. A.; Bork, P., STRING: known and predicted protein-protein associations, integrated and transferred across organisms. *Nucleic Acids Research* **2005**, *33*, D433-D437.
15. Narykov, O.; Johnson, N. T.; Korkin, D., Predicting protein interaction network perturbation by alternative splicing with semi-supervised learning. *Cell Reports* **2021**, *37*.
16. Yang, X.; Coulombe-Huntington, J.; Kang, S.; Sheynkman, Gloria M.; Hao, T.; Richardson, A.; Sun, S.; Yang, F.; Shen, Yun A.; Murray, Ryan R.; Spirohn, K.; Begg, Bridget E.; Duran-Frigola, M.; MacWilliams, A.; Pevzner, Samuel J.; Zhong, Q.; Trigg, Shelly A.; Tam, S.; Ghamsari, L.; Sahni, N.; Yi, S.; Rodriguez, Maria D.; Balcha, D.; Tan, G.; Costanzo, M.; Andrews, B.; Boone, C.; Zhou, Xianghong J.; Salehi-Ashtiani, K.; Charloteaux, B.; Chen, Alyce A.; Calderwood, Michael A.; Aloy, P.; Roth, Frederick P.; Hill, David E.; Iakoucheva, Lilia M.; Xia, Y.; Vidal, M., Widespread Expansion of Protein Interaction Capabilities by Alternative Splicing. *Cell* **2016**, *164*, 805-817.
17. Rolland, T.; Taşan, M.; Charloteaux, B.; Pevzner, Samuel J.; Zhong, Q.; Sahni, N.; Yi, S.; Lemmens, I.; Fontanillo, C.; Mosca, R.; Kamburov, A.; Ghiassian, Susan D.; Yang, X.; Ghamsari, L.; Balcha, D.; Begg, Bridget E.; Braun, P.; Brehme, M.; Broly, Martin P.; Carvunis, A.-R.; Convery-Zupan, D.; Corominas, R.; Coulombe-Huntington, J.; Dann, E.; Dreze, M.; Dricot, A.; Fan, C.; Franzosa, E.; Gebreab, F.; Gutierrez,

- Bryan J.; Hardy, Madeleine F.; Jin, M.; Kang, S.; Kiros, R.; Lin, Guan N.; Luck, K.; MacWilliams, A.; Menche, J.; Murray, Ryan R.; Palagi, A.; Poulin, Matthew M.; Rambout, X.; Rasla, J.; Reichert, P.; Romero, V.; Ruysinck, E.; Sahalie, Julie M.; Scholz, A.; Shah, Akash A.; Sharma, A.; Shen, Y.; Spirohn, K.; Tam, S.; Tejada, Alexander O.; Trigg, Shelly A.; Twizere, J.-C.; Vega, K.; Walsh, J.; Cusick, Michael E.; Xia, Y.; Barabási, A.-L.; Iakoucheva, Lilia M.; Aloy, P.; De Las Rivas, J.; Tavernier, J.; Calderwood, Michael A.; Hill, David E.; Hao, T.; Roth, Frederick P.; Vidal, M., A Proteome-Scale Map of the Human Interactome Network. *Cell* **2014**, 159, 1212-1226.
18. Rual, J.-F.; Venkatesan, K.; Hao, T.; Hirozane-Kishikawa, T.; Dricot, A.; Li, N.; Berriz, G. F.; Gibbons, F. D.; Dreze, M.; Ayivi-Guedehoussou, N.; Klitgord, N.; Simon, C.; Boxem, M.; Milstein, S.; Rosenberg, J.; Goldberg, D. S.; Zhang, L. V.; Wong, S. L.; Franklin, G.; Li, S.; Albala, J. S.; Lim, J.; Fraughton, C.; Llamas, E.; Cevik, S.; Bex, C.; Lamesch, P.; Sikorski, R. S.; Vandenhaute, J.; Zoghbi, H. Y.; Smolyar, A.; Bosak, S.; Sequerra, R.; Doucette-Stamm, L.; Cusick, M. E.; Hill, D. E.; Roth, F. P.; Vidal, M., Towards a proteome-scale map of the human protein–protein interaction network. *Nature* **2005**, 437, 1173-1178.
19. Venkatesan, K.; Rual, J.-F.; Vazquez, A.; Stelzl, U.; Lemmens, I.; Hirozane-Kishikawa, T.; Hao, T.; Zenkner, M.; Xin, X.; Goh, K.-I.; Yildirim, M. A.; Simonis, N.; Heinzmann, K.; Gebreab, F.; Sahalie, J. M.; Cevik, S.; Simon, C.; de Smet, A.-S.; Dann, E.; Smolyar, A.; Vinayagam, A.; Yu, H.; Szeto, D.; Borick, H.; Dricot, A.; Klitgord, N.; Murray, R. R.; Lin, C.; Lalowski, M.; Timm, J.; Rau, K.; Boone, C.; Braun, P.; Cusick, M. E.; Roth, F. P.; Hill, D. E.; Tavernier, J.; Wanker, E. E.; Barabási, A.-L.; Vidal, M., An empirical framework for binary interactome mapping. *Nature Methods* **2009**, 6, 83-90.
20. Yu, H.; Tardivo, L.; Tam, S.; Weiner, E.; Gebreab, F.; Fan, C.; Svrzikapa, N.; Hirozane-Kishikawa, T.; Rietman, E.; Yang, X.; Sahalie, J.; Salehi-Ashtiani, K.; Hao, T.; Cusick, M. E.; Hill, D. E.; Roth, F. P.; Braun, P.; Vidal, M., Next-generation sequencing to generate interactome datasets. *Nature Methods* **2011**, 8, 478-480.
21. Jia, J.; Liu, Z.; Xiao, X.; Liu, B.; Chou, K.-C., iPPBS-Opt: A Sequence-Based Ensemble Classifier for Identifying Protein-Protein Binding Sites by Optimizing Imbalanced Training Datasets. *Molecules (Basel, Switzerland)* **2016**, 21, E95-E95.
22. Deng, L.; Guan, J.; Dong, Q.; Zhou, S., Prediction of protein-protein interaction sites using an ensemble method. *BMC Bioinformatics* **2009**, 10, 426.
23. Yugandhar, K.; Gromiha, M. M., Protein–protein binding affinity prediction from amino acid sequence. *Bioinformatics* **2014**, 30, 3583-3589.
24. Abbasi, W. A.; Yaseen, A.; Hassan, F. U.; Andleeb, S.; Minhas, F. U. A. A., ISLAND: in-silico proteins binding affinity prediction using sequence information. *BioData Mining* **2020**, 13, 20.
25. Cao, D.-S.; Xu, Q.-S.; Liang, Y.-Z., propy: a tool to generate various modes of Chou’s PseAAC. *Bioinformatics* **2013**, 29, 960-962.
26. Huang, X.; Zheng, W.; Pearce, R.; Zhang, Y., SSIPe: accurately estimating protein–protein binding affinity change upon mutations using evolutionary profiles in combination with an optimized physical energy function. *Bioinformatics* **2020**, 36, 2429-2437.
27. Xiong, P.; Zhang, C.; Zheng, W.; Zhang, Y., BindProfX: Assessing Mutation-Induced Binding Affinity Change by Protein Interface Profiles with Pseudo-Counts. *Journal of Molecular Biology* **2017**, 429, 426-434.
28. Jankauskaitė, J.; Jiménez-García, B.; Dapkūnas, J.; Fernández-Recio, J.; Moal, I. H., SKEMPI 2.0: an updated benchmark of changes in protein–protein binding energy, kinetics and thermodynamics upon mutation. *Bioinformatics* **2019**, 35, 462-469.
29. Janin, J.; Henrick, K.; Moult, J.; Eyck, L. T.; Sternberg, M. J. E.; Vajda, S.; Vakser, I.; Wodak, S. J., CAPRI: A Critical Assessment of PRedicted Interactions. *Proteins: Structure, Function, and Bioinformatics* **2003**, 52, 2-9.
30. Wang, B.; Su, Z.; Wu, Y., Computational Assessment of Protein–Protein Binding Affinity by Reverse Engineering the Energetics in Protein Complexes. *Genomics, Proteomics & Bioinformatics* **2021**.



31. Moal, I. H.; Fernández-Recio, J., SKEMPI: a Structural Kinetic and Energetic database of Mutant Protein Interactions and its use in empirical models. *Bioinformatics* **2012**, *28*, 2600-2607.
32. Abbasi, W. A.; Asif, A.; Ben-Hur, A.; Minhas, F. u. A. A., Learning protein binding affinity using privileged information. *BMC Bioinformatics* **2018**, *19*, 425.
33. Chen, J.; Sawyer, N.; Regan, L., Protein–protein interactions: General trends in the relationship between binding affinity and interfacial buried surface area. *Protein Science* **2013**, *22*, 510-515.
34. Eddy, S. R., Where did the BLOSUM62 alignment score matrix come from? *Nature Biotechnology* **2004**, *22*, 1035-1036.
35. Moal, I. H.; Agius, R.; Bates, P. A., Protein–protein binding affinity prediction on a diverse set of structures. *Bioinformatics* **2011**, *27*, 3002-3009.
36. Dias, R.; Kolaczowski, B., Improving the accuracy of high-throughput protein-protein affinity prediction may require better training data. *BMC Bioinformatics* **2017**, *18*, 102.
37. Yang, J.; Roy, A.; Zhang, Y., BioLiP: a semi-manually curated database for biologically relevant ligand-protein interactions. *Nucleic acids research* **2013**, *41*, D1096-103.
38. Xue, L. C.; Rodrigues, J. P.; Kastiris, P. L.; Bonvin, A. M.; Vangone, A., PRODIGY: a web server for predicting the binding affinity of protein–protein complexes. *Bioinformatics* **2016**, *32*, 3676-3678.
39. Ballester, P. J.; Mitchell, J. B. O., A machine learning approach to predicting protein-ligand binding affinity with applications to molecular docking. *Bioinformatics (Oxford, England)* **2010**, *26*, 1169-1175.
40. Ruiz-Blanco, Y. B.; Paz, W.; Green, J.; Marrero-Ponce, Y., ProtDCal: A program to compute general-purpose-numerical descriptors for sequences and 3D-structures of proteins. *BMC Bioinformatics* **2015**, *16*, 162.
41. Romero-Molina, S.; Ruiz-Blanco, Y. B.; Green, J. R.; Sanchez-Garcia, E., ProtDCal-Suite: A web server for the numerical codification and functional analysis of proteins. *Protein Science* **2019**, *28*, 1734-1743.
42. Harms, M.; Gilg, A.; Ständker, L.; Beer, A. J.; Mayer, B.; Rasche, V.; Gruber, C. W.; Münch, J., Microtiter plate-based antibody-competition assay to determine binding affinities and plasma/blood stability of CXCR4 ligands. *Scientific Reports* **2020**, *10*, 16036.
43. Runyon, S. T.; Zhang, Y.; Appleton, B. A.; Sazinsky, S. L.; Wu, P.; Pan, B.; Wiesmann, C.; Skelton, N. J.; Sidhu, S. S., Structural and functional analysis of the PDZ domains of human HtrA1 and HtrA3. *Protein Science* **2007**, *16*, 2454-2471.
